# Supplementary material
Source: PubMed Central journal article supplement (PMC6613075)
Supplement: pnas.1901093116.sapp.pdf [file pnas.1901093116.sapp.pdf]

## Supplementary Information for

Polar Bear Evolution is marked by Rapid Changes in Gene Copy Number in Response to Dietary Shift

David C. Rinker\*, Natalya K. Specian\*, Shu Zhao, and John G. Gibbons

\*Authors contributed equally

Email: [jggibbons@umass.edu](mailto:jggibbons@umass.edu)

### **This PDF file includes:**

Figs. S1 to S7  
Tables S1 to S9  
Captions for datasets S1 to S2

### **Other supplementary materials for this manuscript include the following:**

Datasets S1 to S2

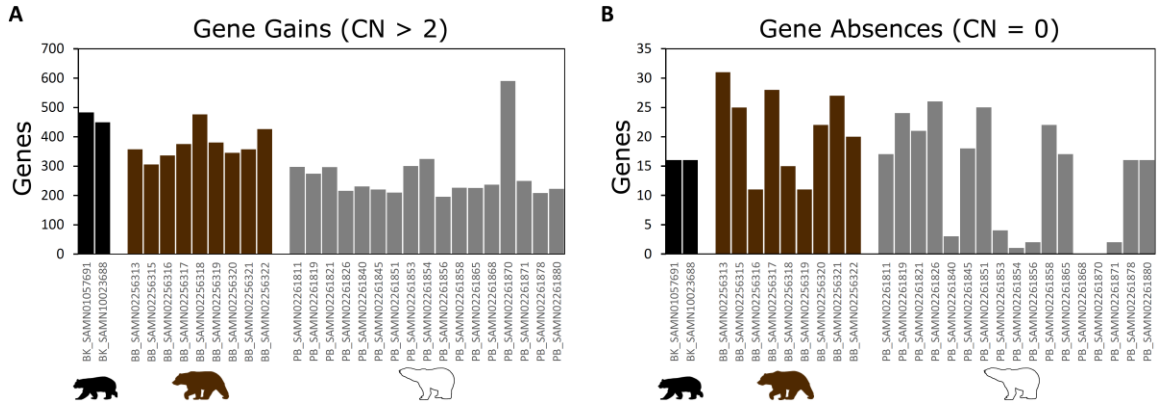

**Fig S1. Gene gain (A) and absence (B) frequencies across bear individuals.** Gains are defined as estimates of gene copy number > 2 by both Control-FreeC and BDN. Absences are defined as estimates of gene copy number = 0 by both Control-FreeC and BDN. BKB\_ = black bear, BB\_ = brown bear, and PB\_ = polar bear.

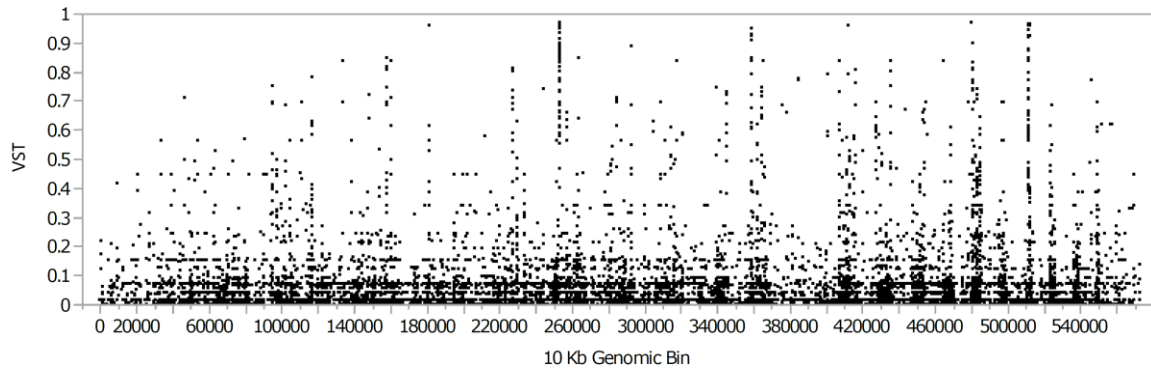

**Fig. S2. Genome-wide copy number divergence between brown bear and polar bear.** Manhattan plot of  $V_{ST}$  values (Y-axis) for each 10 Kb bin with a 2 Kb sliding window (X-axis) in the polar bear reference genome. Genome-wide mean  $V_{ST} = 0.006$ .

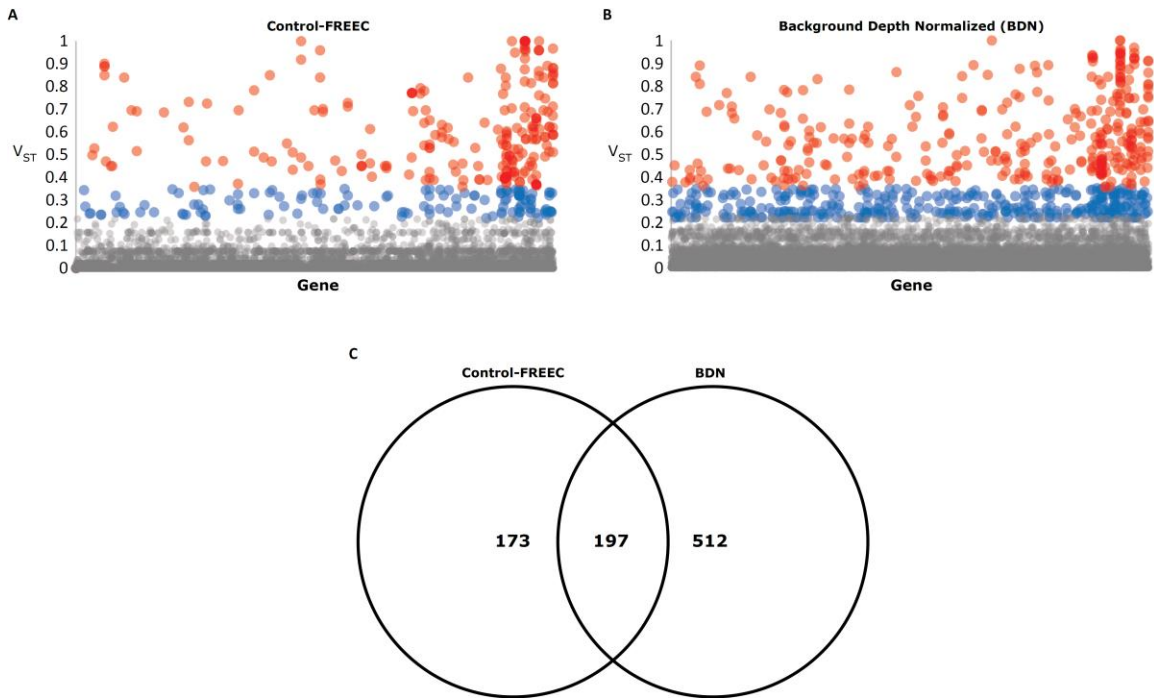

**Fig. S3. Overlap between  $V_{ST}$  values from Control-FREEC and BDN gene copy number estimates.** Manhattan plot of gene  $V_{ST}$  values using Control-FREEC (A) and BDN (B) gene copy number estimates. Red points =  $V_{ST} > 0.35$  (extremely CN differentiated), blue points =  $V_{ST} > 0.22$  and  $V_{ST} \leq 0.35$  (CN differentiated), and gray points =  $V_{ST} \leq 0.22$ . (C) Venn diagram of copy number differentiated genes ( $V_{ST} > 0.22$ ) between the Control-FREEC and BDN methods.

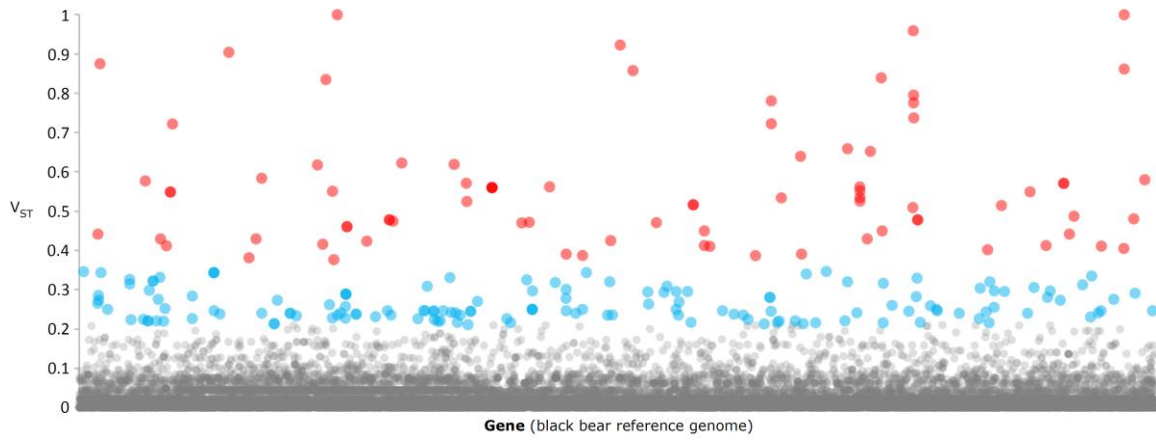

**Fig. S4. Manhattan plot of gene  $V_{ST}$  values from Control-FREEC gene copy number estimates relative to the black bear reference genome. Red points =  $V_{ST} > 0.35$  (extremely CN differentiated), blue points =  $V_{ST} > 0.22$  and  $V_{ST} \leq 0.35$  (CN differentiated), and gray points =  $V_{ST} \leq 0.22$ .**





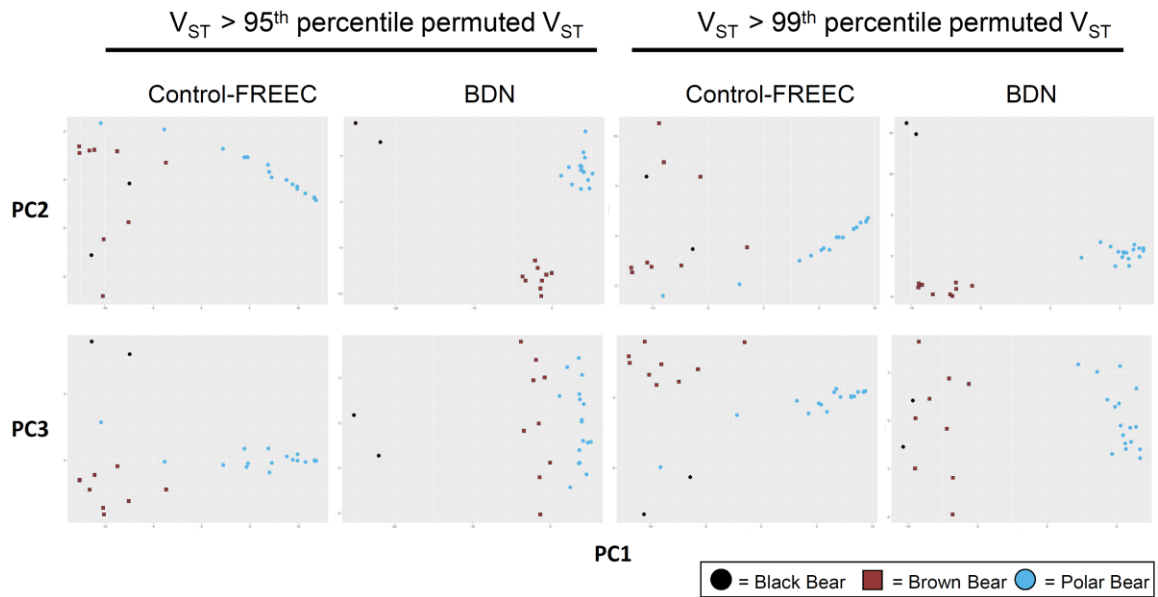

**Fig. S7. Principal component analysis of copy number differentiated genes.** Principal component analysis performed on gene copy number counts in all bear individuals as called by either Control-FREEC or BDN. In every case, the first three principal components (PC1, PC2, and PC3) explained over 80% of the measured CN variance. The 95th and 99th percentile  $V_{ST}$  cutoffs for each gene were determined by permutation tests.



**Table S1. Percentage of mapped reads against the reference polar bear and black bear genomes. BB = brown bear, BK = black bear, and PB\_ = polar bear.**

| Sample          | Polar Bear | Black Bear |
|-----------------|------------|------------|
| BB_SAMN02256313 | 98.01      | 97.57      |
| BB_SAMN02256315 | 97.3       | 97.14      |
| BB_SAMN02256316 | 98.33      | 98         |
| BB_SAMN02256317 | 97.5       | 97.14      |
| BB_SAMN02256318 | 98.55      | 98.15      |
| BB_SAMN02256319 | 98.19      | 97.91      |
| BB_SAMN02256320 | 97.36      | 97.19      |
| BB_SAMN02256321 | 96.7       | 96.44      |
| BB_SAMN02256322 | 90.46      | 90.12      |
| BK_SAMN01057691 | 97.82      | 98.06      |
| BK_SAMN10023688 | 97.86      | 98.75      |
| PB_SAMN02261811 | 98.47      | 97.71      |
| PB_SAMN02261819 | 98.65      | 97.82      |
| PB_SAMN02261821 | 99.07      | 98.12      |
| PB_SAMN02261826 | 99         | 98.28      |
| PB_SAMN02261840 | 98.08      | 97.63      |
| PB_SAMN02261845 | 98.19      | 97.59      |
| PB_SAMN02261851 | 98.33      | 97.91      |
| PB_SAMN02261853 | 98.54      | 98.03      |
| PB_SAMN02261854 | 97.63      | 97.37      |
| PB_SAMN02261856 | 96.87      | 95.2       |
| PB_SAMN02261858 | 98.27      | 97.65      |
| PB_SAMN02261865 | 98.54      | 97.94      |
| PB_SAMN02261868 | 98.38      | 97.9       |
| PB_SAMN02261870 | 98.01      | 97.39      |
| PB_SAMN02261871 | 98.14      | 97.73      |
| PB_SAMN02261878 | 98.62      | 98.16      |
| PB_SAMN02261880 | 98.28      | 97.78      |

**Table S2.** GO Biological Process enrichment for polar bear genes displaying gain (copy number > 2) with both CNV estimation methods in at least one individual. Enrichment analysis was conducted via ShinyGoV0.51 (<http://bioinformatics.sdstate.edu/go/>).

| <b>Enrichment FDR</b> | <b>Genes in list</b> | <b>Total genes</b> | <b>Functional Category</b>                                                           |
|-----------------------|----------------------|--------------------|--------------------------------------------------------------------------------------|
| 3.40E-06              | 147                  | 2727               | Catabolic process                                                                    |
| 3.40E-06              | 135                  | 2414               | Cellular catabolic process                                                           |
| 3.60E-06              | 66                   | 911                | MRNA metabolic process                                                               |
| 1.50E-05              | 31                   | 293                | Regulation of mRNA metabolic process                                                 |
| 2.10E-05              | 21                   | 150                | Antibiotic metabolic process                                                         |
| 4.80E-05              | 78                   | 1252               | Cellular macromolecule catabolic process                                             |
| 5.10E-05              | 89                   | 1506               | Macromolecule catabolic process                                                      |
| 1.00E-04              | 44                   | 568                | MRNA processing                                                                      |
| 1.10E-04              | 39                   | 479                | RNA splicing                                                                         |
| 1.10E-04              | 120                  | 2282               | Organic substance catabolic process                                                  |
| 1.90E-04              | 64                   | 1005               | RNA processing                                                                       |
| 3.10E-04              | 199                  | 4374               | Regulation of nucleobase-containing compound metabolic process                       |
| 3.30E-04              | 25                   | 251                | Gene silencing                                                                       |
| 3.30E-04              | 55                   | 833                | Drug metabolic process                                                               |
| 3.40E-04              | 32                   | 377                | RNA splicing, via transesterification reactions with bulged adenosine as nucleophile |
| 3.40E-04              | 32                   | 377                | MRNA splicing, via spliceosome                                                       |
| 3.50E-04              | 44                   | 611                | Nucleobase-containing compound catabolic process                                     |
| 3.60E-04              | 32                   | 380                | RNA splicing, via transesterification reactions                                      |
| 3.60E-04              | 47                   | 676                | Aromatic compound catabolic process                                                  |
| 3.70E-04              | 39                   | 516                | Detection of chemical stimulus involved in sensory perception of smell               |
| 3.80E-04              | 213                  | 4798               | Regulation of gene expression                                                        |
| 3.80E-04              | 60                   | 958                | Regulation of catabolic process                                                      |
| 3.90E-04              | 46                   | 662                | Heterocycle catabolic process                                                        |
| 4.10E-04              | 46                   | 664                | Cellular nitrogen compound catabolic process                                         |
| 4.50E-04              | 48                   | 709                | Organic cyclic compound catabolic process                                            |
| 9.50E-04              | 52                   | 816                | Detection of stimulus                                                                |
| 1.10E-03              | 41                   | 588                | Detection of chemical stimulus involved in sensory perception                        |
| 1.10E-03              | 39                   | 548                | Sensory perception of smell                                                          |
| 1.10E-03              | 12                   | 77                 | Positive regulation of mRNA metabolic process                                        |
| 1.50E-03              | 31                   | 398                | RNA catabolic process                                                                |
| 1.50E-03              | 202                  | 4628               | Heterocycle biosynthetic process                                                     |
| 1.50E-03              | 43                   | 644                | Detection of stimulus involved in sensory perception                                 |
| 1.50E-03              | 182                  | 4089               | Regulation of RNA metabolic process                                                  |
| 1.50E-03              | 208                  | 4791               | Organic cyclic compound biosynthetic process                                         |
| 1.60E-03              | 29                   | 364                | MRNA catabolic process                                                               |

|          |     |      |                                                            |
|----------|-----|------|------------------------------------------------------------|
| 1.60E-03 | 202 | 4635 | Aromatic compound biosynthetic process                     |
| 1.60E-03 | 42  | 627  | Detection of chemical stimulus                             |
| 2.20E-03 | 106 | 2142 | Small molecule metabolic process                           |
| 2.20E-03 | 185 | 4205 | Regulation of cellular macromolecule biosynthetic process  |
| 2.20E-03 | 198 | 4559 | Nucleobase-containing compound biosynthetic process        |
| 2.30E-03 | 70  | 1270 | Chromosome organization                                    |
| 2.50E-03 | 51  | 838  | Regulation of cellular catabolic process                   |
| 2.80E-03 | 16  | 147  | Regulation of mRNA processing                              |
| 2.90E-03 | 42  | 648  | Sensory perception of chemical stimulus                    |
| 2.90E-03 | 189 | 4345 | Regulation of macromolecule biosynthetic process           |
| 2.90E-03 | 38  | 564  | Posttranscriptional regulation of gene expression          |
| 3.10E-03 | 197 | 4570 | Regulation of biosynthetic process                         |
| 3.20E-03 | 17  | 166  | Gene silencing by RNA                                      |
| 3.70E-03 | 142 | 3112 | Negative regulation of metabolic process                   |
| 3.70E-03 | 16  | 152  | Intracellular steroid hormone receptor signaling pathway   |
| 4.40E-03 | 25  | 315  | Regulation of gene expression, epigenetic                  |
| 4.40E-03 | 193 | 4495 | Regulation of cellular biosynthetic process                |
| 4.70E-03 | 23  | 279  | Cellular response to steroid hormone stimulus              |
| 5.10E-03 | 21  | 244  | Nuclear-transcribed mRNA catabolic process                 |
| 5.30E-03 | 16  | 158  | Regulation of mRNA catabolic process                       |
| 6.50E-03 | 44  | 723  | Translation                                                |
| 6.80E-03 | 8   | 45   | Positive regulation of mRNA catabolic process              |
| 7.40E-03 | 9   | 58   | Antibiotic catabolic process                               |
| 7.40E-03 | 173 | 3999 | Nucleic acid-templated transcription                       |
| 8.20E-03 | 4   | 9    | Ovulation from ovarian follicle                            |
| 9.20E-03 | 7   | 36   | Termination of RNA polymerase II transcription             |
| 9.20E-03 | 130 | 2872 | Negative regulation of macromolecule metabolic process     |
| 9.20E-03 | 173 | 4021 | RNA biosynthetic process                                   |
| 9.20E-03 | 17  | 185  | Negative regulation of mitotic cell cycle phase transition |
| 1.00E-02 | 29  | 418  | Response to steroid hormone                                |
| 1.10E-02 | 170 | 3956 | Transcription, DNA-templated                               |
| 1.10E-02 | 10  | 76   | Androgen receptor signaling pathway                        |
| 1.10E-02 | 44  | 748  | Peptide biosynthetic process                               |
| 1.10E-02 | 95  | 1984 | Organonitrogen compound biosynthetic process               |
| 1.20E-02 | 172 | 4022 | Organelle organization                                     |
| 1.50E-02 | 22  | 289  | Negative regulation of mitotic cell cycle                  |
| 1.50E-02 | 131 | 2943 | Transcription by RNA polymerase II                         |
| 1.60E-02 | 71  | 1404 | Regulation of hydrolase activity                           |
| 1.60E-02 | 61  | 1163 | Organic acid metabolic process                             |
| 1.60E-02 | 50  | 902  | Peptide metabolic process                                  |

|          |     |      |                                                                         |
|----------|-----|------|-------------------------------------------------------------------------|
| 1.60E-02 | 6   | 29   | Retrograde protein transport, ER to cytosol                             |
| 1.60E-02 | 6   | 29   | Endoplasmic reticulum to cytosol transport                              |
| 1.60E-02 | 14  | 144  | Drug catabolic process                                                  |
| 1.80E-02 | 32  | 502  | Covalent chromatin modification                                         |
| 1.90E-02 | 47  | 842  | Chromatin organization                                                  |
| 2.00E-02 | 52  | 962  | Response to organic cyclic compound                                     |
| 2.00E-02 | 17  | 202  | Negative regulation of cell cycle phase transition                      |
| 2.10E-02 | 121 | 2709 | Negative regulation of cellular metabolic process                       |
| 2.10E-02 | 4   | 12   | Positive regulation of nuclear-transcribed mRNA poly(A) tail shortening |
| 2.20E-02 | 7   | 43   | Nuclear-transcribed mRNA poly(A) tail shortening                        |
| 2.20E-02 | 5   | 21   | Ovulation                                                               |
| 2.30E-02 | 25  | 363  | Regulation of translation                                               |
| 2.30E-02 | 61  | 1188 | Cellular amide metabolic process                                        |
| 2.30E-02 | 35  | 579  | Cellular response to organic cyclic compound                            |
| 2.40E-02 | 11  | 102  | Regulation of mRNA splicing, via spliceosome                            |
| 2.50E-02 | 64  | 1267 | Carbohydrate derivative metabolic process                               |
| 2.60E-02 | 17  | 209  | Steroid hormone mediated signaling pathway                              |
| 2.60E-02 | 7   | 45   | Response to dexamethasone                                               |
| 2.60E-02 | 14  | 154  | Regulation of G1/S transition of mitotic cell cycle                     |
| 2.70E-02 | 20  | 268  | Hormone-mediated signaling pathway                                      |
| 2.80E-02 | 53  | 1007 | Protein catabolic process                                               |
| 2.90E-02 | 11  | 105  | Negative regulation of G1/S transition of mitotic cell cycle            |
| 3.50E-02 | 48  | 898  | Amide biosynthetic process                                              |
| 3.50E-02 | 4   | 14   | Regulation of nuclear-transcribed mRNA poly(A) tail shortening          |
| 3.50E-02 | 13  | 142  | Negative regulation of translation                                      |
| 3.60E-02 | 2   | 2    | Glucosamine catabolic process                                           |
| 3.60E-02 | 90  | 1952 | Negative regulation of gene expression                                  |
| 3.60E-02 | 21  | 298  | Macroautophagy                                                          |
| 3.60E-02 | 30  | 488  | Histone modification                                                    |
| 3.60E-02 | 27  | 422  | Regulation of cellular amide metabolic process                          |
| 3.60E-02 | 10  | 93   | Mitochondrial ATP synthesis coupled electron transport                  |
| 3.60E-02 | 13  | 144  | Regulation of RNA splicing                                              |
| 3.60E-02 | 36  | 624  | Negative regulation of cell cycle                                       |
| 3.60E-02 | 8   | 62   | Protein K48-linked ubiquitination                                       |
| 3.60E-02 | 11  | 109  | Negative regulation of cell cycle G1/S phase transition                 |
| 3.60E-02 | 2   | 2    | Positive regulation of telomerase RNA reverse transcriptase activity    |
| 3.60E-02 | 2   | 2    | Positive regulation of ubiquitin-specific protease activity             |
| 3.60E-02 | 2   | 2    | Regulation of nucleotide-excision repair                                |

|          |     |      |                                                            |
|----------|-----|------|------------------------------------------------------------|
| 3.70E-02 | 3   | 7    | CDP-choline pathway                                        |
| 3.70E-02 | 62  | 1248 | Organophosphate metabolic process                          |
| 3.70E-02 | 10  | 94   | ATP synthesis coupled electron transport                   |
| 3.70E-02 | 60  | 1202 | Intracellular protein transport                            |
| 3.70E-02 | 5   | 25   | Histone mRNA metabolic process                             |
| 3.70E-02 | 22  | 321  | Negative regulation of cell cycle process                  |
| 3.70E-02 | 45  | 837  | Positive regulation of hydrolase activity                  |
| 3.70E-02 | 27  | 427  | Regulation of cell cycle phase transition                  |
| 3.90E-02 | 6   | 37   | Protein deglycosylation                                    |
| 4.20E-02 | 88  | 1920 | Intracellular transport                                    |
| 4.20E-02 | 20  | 284  | Rhythmic process                                           |
| 4.20E-02 | 112 | 2551 | Negative regulation of nitrogen compound metabolic process |
| 4.20E-02 | 159 | 3823 | Regulation of nucleic acid-templated transcription         |
| 4.20E-02 | 21  | 305  | Intrinsic apoptotic signaling pathway                      |
| 4.20E-02 | 28  | 455  | Positive regulation of catabolic process                   |
| 4.30E-02 | 30  | 500  | Autophagy                                                  |
| 4.30E-02 | 30  | 500  | Process utilizing autophagic mechanism                     |
| 4.30E-02 | 23  | 348  | Regulation of chromosome organization                      |
| 4.50E-02 | 11  | 115  | Protein deacylation                                        |
| 4.50E-02 | 57  | 1143 | Oxoacid metabolic process                                  |
| 4.50E-02 | 25  | 393  | Regulation of mitotic cell cycle phase transition          |
| 4.50E-02 | 159 | 3836 | Regulation of RNA biosynthetic process                     |
| 4.50E-02 | 31  | 526  | Purine ribonucleotide metabolic process                    |
| 4.50E-02 | 44  | 828  | Cellular protein catabolic process                         |
| 4.70E-02 | 30  | 505  | Glycerolipid metabolic process                             |
| 4.70E-02 | 34  | 596  | Purine-containing compound metabolic process               |
| 4.70E-02 | 34  | 596  | Establishment of protein localization to organelle         |
| 4.70E-02 | 38  | 689  | Modification-dependent macromolecule catabolic process     |
| 4.70E-02 | 14  | 171  | Regulation of cell cycle G1/S phase transition             |
| 4.70E-02 | 8   | 68   | Histone H4 acetylation                                     |
| 4.80E-02 | 156 | 3765 | Regulation of transcription, DNA-templated                 |
| 4.80E-02 | 18  | 250  | Cell cycle checkpoint                                      |
| 4.90E-02 | 11  | 118  | Nucleotide-excision repair                                 |
| 5.00E-02 | 20  | 292  | Response to xenobiotic stimulus                            |

**Table S3.** GO Biological Process enrichment for brown bear genes displaying gain (copy number > 2) with both CNV estimation methods in at least one individual. Enrichment analysis was conducted via ShinyGoV0.51 (<http://bioinformatics.sdstate.edu/go/>).

| <b>Enrichment FDR</b> | <b>Genes in list</b> | <b>Total genes</b> | <b>Functional Category</b>                                             |
|-----------------------|----------------------|--------------------|------------------------------------------------------------------------|
| 5.10E-32              | 61                   | 516                | Detection of chemical stimulus involved in sensory perception of smell |
| 6.70E-32              | 64                   | 588                | Detection of chemical stimulus involved in sensory perception          |
| 2.40E-31              | 65                   | 627                | Detection of chemical stimulus                                         |
| 4.10E-31              | 61                   | 548                | Sensory perception of smell                                            |
| 7.20E-31              | 65                   | 644                | Detection of stimulus involved in sensory perception                   |
| 7.10E-30              | 64                   | 648                | Sensory perception of chemical stimulus                                |
| 1.80E-27              | 68                   | 816                | Detection of stimulus                                                  |
| 3.50E-21              | 70                   | 1110               | Sensory perception                                                     |
| 1.20E-15              | 74                   | 1546               | G protein-coupled receptor signaling pathway                           |
| 5.00E-15              | 74                   | 1589               | Nervous system process                                                 |
| 7.30E-13              | 88                   | 2321               | System process                                                         |

**Table S4.** GO Biological Process enrichment for polar bear genes displaying absence (copy number = 0) with both CNV estimation methods in at least one individual. Enrichment analysis was conducted via ShinyGoV0.51 (<http://bioinformatics.sdstate.edu/go/>).

| <b>Enrichment FDR</b> | <b>Genes in list</b> | <b>Total genes</b> | <b>Functional Category</b>                                             |
|-----------------------|----------------------|--------------------|------------------------------------------------------------------------|
| 1.00E-04              | 7                    | 548                | Sensory perception of smell                                            |
| 1.00E-04              | 7                    | 516                | Detection of chemical stimulus involved in sensory perception of smell |
| 1.00E-04              | 7                    | 648                | Sensory perception of chemical stimulus                                |
| 1.00E-04              | 7                    | 627                | Detection of chemical stimulus                                         |
| 1.00E-04              | 7                    | 644                | Detection of stimulus involved in sensory perception                   |
| 1.00E-04              | 7                    | 588                | Detection of chemical stimulus involved in sensory perception          |
| 4.00E-04              | 7                    | 816                | Detection of stimulus                                                  |
| 2.50E-03              | 7                    | 1110               | Sensory perception                                                     |
| 3.10E-03              | 8                    | 1589               | Nervous system process                                                 |
| 5.40E-03              | 2                    | 27                 | Histone lysine demethylation                                           |
| 6.30E-03              | 2                    | 33                 | Protein demethylation                                                  |
| 6.30E-03              | 2                    | 33                 | Protein dealkylation                                                   |
| 6.30E-03              | 2                    | 31                 | Histone demethylation                                                  |
| 1.00E-02              | 7                    | 1546               | G protein-coupled receptor signaling pathway                           |
| 2.30E-02              | 8                    | 2321               | System process                                                         |
| 2.40E-02              | 2                    | 72                 | Demethylation                                                          |

**Table S5.** GO Biological Process enrichment for brown bear genes displaying absence (copy number = 0) with both CNV estimation methods in at least one individual. Enrichment analysis was conducted via ShinyGoV0.51 (<http://bioinformatics.sdstate.edu/go/>).

| <b>Enrichment FDR</b> | <b>Genes in list</b> | <b>Total genes</b> | <b>Functional Category</b>                                             |
|-----------------------|----------------------|--------------------|------------------------------------------------------------------------|
| 4.50E-11              | 14                   | 648                | Sensory perception of chemical stimulus                                |
| 4.50E-11              | 14                   | 627                | Detection of chemical stimulus                                         |
| 4.50E-11              | 14                   | 644                | Detection of stimulus involved in sensory perception                   |
| 4.50E-11              | 14                   | 588                | Detection of chemical stimulus involved in sensory perception          |
| 4.50E-11              | 13                   | 516                | Detection of chemical stimulus involved in sensory perception of smell |
| 8.00E-11              | 13                   | 548                | Sensory perception of smell                                            |
| 6.30E-10              | 14                   | 816                | Detection of stimulus                                                  |
| 3.10E-08              | 14                   | 1110               | Sensory perception                                                     |
| 1.90E-06              | 14                   | 1546               | G protein-coupled receptor signaling pathway                           |
| 2.30E-06              | 14                   | 1589               | Nervous system process                                                 |
| 2.00E-04              | 14                   | 2321               | System process                                                         |
| 2.50E-04              | 2                    | 4                  | L-arginine import across plasma membrane                               |
| 3.90E-04              | 2                    | 5                  | L-arginine transmembrane transport                                     |
| 4.20E-04              | 2                    | 6                  | Ornithine transport                                                    |
| 4.20E-04              | 2                    | 6                  | L-lysine transport                                                     |
| 4.20E-04              | 2                    | 6                  | L-ornithine transmembrane transport                                    |
| 4.20E-04              | 2                    | 6                  | L-lysine transmembrane transport                                       |
| 4.20E-04              | 2                    | 6                  | Arginine transmembrane transport                                       |
| 5.60E-04              | 2                    | 7                  | L-arginine transport                                                   |
| 8.60E-04              | 2                    | 9                  | Arginine transport                                                     |
| 8.60E-04              | 2                    | 9                  | Basic amino acid transmembrane transport                               |
| 2.10E-03              | 2                    | 14                 | Basic amino acid transport                                             |
| 5.00E-03              | 2                    | 22                 | Amino acid import across plasma membrane                               |
| 6.20E-03              | 2                    | 25                 | Amino acid import                                                      |
| 6.90E-03              | 2                    | 27                 | Histone lysine demethylation                                           |
| 8.80E-03              | 2                    | 31                 | Histone demethylation                                                  |
| 9.00E-03              | 2                    | 33                 | Protein demethylation                                                  |
| 9.00E-03              | 3                    | 131                | Amino acid transport                                                   |
| 9.00E-03              | 2                    | 33                 | Protein dealkylation                                                   |
| 2.00E-02              | 2                    | 50                 | L-alpha-amino acid transmembrane transport                             |
| 3.10E-02              | 3                    | 212                | Translational initiation                                               |
| 3.10E-02              | 2                    | 65                 | L-amino acid transport                                                 |
| 3.70E-02              | 2                    | 72                 | Demethylation                                                          |
| 4.60E-02              | 2                    | 83                 | Amino acid transmembrane transport                                     |



|          |   |    |                                     |
|----------|---|----|-------------------------------------|
| 4.60E-02 | 2 | 84 | Positive regulation of ossification |
| 4.80E-02 | 2 | 87 | Drug transmembrane transport        |

**Table S7.** Enrichment of genes differentiated by copy number ( $V_{ST} > 0.22$ ) between brown bear and polar bear. Enrichment analysis was conducted via ShinyGoV0.51 (<http://bioinformatics.sdstate.edu/go/>).

| <b>Enrichment FDR</b> | <b>Genes in list</b> | <b>Total genes</b> | <b>Functional Category</b>                                                  |
|-----------------------|----------------------|--------------------|-----------------------------------------------------------------------------|
| 7.80E-42              | 37                   | 429                | Olfactory transduction                                                      |
| 2.80E-39              | 37                   | 516                | Detection of chemical stimulus involved in sensory perception of smell      |
| 2.80E-39              | 37                   | 516                | Olfactory receptor activity                                                 |
| 6.60E-39              | 35                   | 429                | Reactome:R-HSA-381753 Olfactory Signaling Pathway                           |
| 1.60E-38              | 37                   | 548                | Sensory perception of smell                                                 |
| 1.90E-37              | 37                   | 588                | Detection of chemical stimulus involved in sensory perception               |
| 1.70E-36              | 37                   | 627                | Detection of chemical stimulus                                              |
| 2.00E-36              | 36                   | 571                | Reactome:R-HSA-418555 G alpha (s) signalling events                         |
| 3.70E-36              | 37                   | 644                | Detection of stimulus involved in sensory perception                        |
| 4.10E-36              | 37                   | 648                | Sensory perception of chemical stimulus                                     |
| 1.80E-32              | 37                   | 816                | Detection of stimulus                                                       |
| 1.40E-30              | 38                   | 1006               | G protein-coupled receptor activity                                         |
| 1.10E-27              | 37                   | 1110               | Sensory perception                                                          |
| 8.60E-26              | 36                   | 1155               | Reactome:R-HSA-388396 GPCR downstream signalling                            |
| 4.70E-25              | 36                   | 1215               | Reactome:R-HSA-372790 Signaling by GPCR                                     |
| 1.00E-24              | 39                   | 1582               | Transmembrane signaling receptor activity                                   |
| 6.80E-24              | 38                   | 1546               | G protein-coupled receptor signaling pathway                                |
| 1.70E-23              | 38                   | 1589               | Nervous system process                                                      |
| 2.80E-22              | 39                   | 1850               | Signaling receptor activity                                                 |
| 8.50E-22              | 39                   | 1910               | Molecular transducer activity                                               |
| 9.30E-19              | 39                   | 2321               | System process                                                              |
| 1.50E-15              | 38                   | 2690               | Reactome:R-HSA-162582 Signal Transduction                                   |
| 9.80E-07              | 7                    | 89                 | Reactome:R-HSA-2168880 Scavenging of heme from plasma                       |
| 1.10E-06              | 7                    | 91                 | GeneSetDB:EHMN Arachidonic acid metabolism                                  |
| 2.20E-06              | 7                    | 101                | GeneSetDB:EHMN Leukotriene metabolism                                       |
| 6.20E-06              | 7                    | 118                | Reactome:R-HSA-2173782 Binding and Uptake of Ligands by Scavenger Receptors |
| 8.00E-06              | 3                    | 4                  | Recon X:ALOX12                                                              |
| 9.90E-06              | 10                   | 354                | MSigDB:chr11p15                                                             |
| 1.70E-05              | 6                    | 85                 | Reactome:R-HSA-173623 Classical antibody-mediated complement activation     |
| 2.20E-05              | 6                    | 89                 | Reactome:R-HSA-2730905 Role of LAT2/NTAL/LAB on calcium mobilization        |
| 2.40E-05              | 6                    | 91                 | Reactome:R-HSA-2029481 FCGR activation                                      |
| 2.70E-05              | 6                    | 93                 | Reactome:R-HSA-166786 Creation of C4 and C2 activators                      |

|          |   |     |                                                                                                |
|----------|---|-----|------------------------------------------------------------------------------------------------|
| 4.00E-05 | 6 | 100 | Reactome:R-HSA-166663 Initial triggering of complement                                         |
| 4.80E-05 | 6 | 104 | Reactome:R-HSA-2871809 FCERI mediated Ca <sup>2+</sup> mobilization                            |
| 4.80E-05 | 6 | 104 | Reactome:R-HSA-2029485 Role of phospholipids in phagocytosis                                   |
| 4.90E-05 | 6 | 105 | Reactome:R-HSA-2871796 FCERI mediated MAPK activation                                          |
| 1.30E-04 | 6 | 124 | Reactome:R-HSA-977606 Regulation of Complement cascade                                         |
| 2.00E-04 | 6 | 135 | Reactome:R-HSA-166658 Complement cascade                                                       |
| 2.40E-04 | 6 | 140 | Reactome:R-HSA-2029482 Regulation of actin dynamics for phagocytic cup formation               |
| 3.80E-04 | 4 | 41  | GeneSetDB:EHMN Prostaglandin formation from arachidonate                                       |
| 4.00E-04 | 6 | 154 | Reactome:R-HSA-2871837 FCERI mediated NF- $\kappa$ B activation                                |
| 4.30E-04 | 2 | 2   | Recon X:LTA4H                                                                                  |
| 5.60E-04 | 6 | 165 | Reactome:R-HSA-2029480 Fc $\gamma$ receptor (FCGR) dependent phagocytosis                      |
| 6.20E-04 | 7 | 254 | Wiki:GPCRs, Class A Rhodopsin-like                                                             |
| 7.00E-04 | 7 | 260 | MSigDB:chr22q11                                                                                |
| 8.60E-04 | 6 | 180 | Reactome:R-HSA-8978868 Fatty acid metabolism                                                   |
| 1.10E-03 | 2 | 3   | Recon X:CHEBI                                                                                  |
| 1.10E-03 | 2 | 3   | CTD:CHEBI                                                                                      |
| 1.10E-03 | 2 | 3   | CTD:CHEBI                                                                                      |
| 1.60E-03 | 3 | 22  | GeneSetDB:MATADOR acarbose                                                                     |
| 1.70E-03 | 6 | 206 | Reactome:R-HSA-198933 Immunoregulatory interactions between a Lymphoid and a non-Lymphoid cell |
| 1.70E-03 | 6 | 207 | Reactome:R-HSA-2454202 Fc epsilon receptor (FCERI) signaling                                   |
| 1.80E-03 | 6 | 211 | Recon X:SLC7A9                                                                                 |
| 1.90E-03 | 6 | 213 | Reactome:R-HSA-202733 Cell surface interactions at the vascular wall                           |
| 1.90E-03 | 2 | 4   | L-arginine import across plasma membrane                                                       |
| 2.70E-03 | 4 | 73  | Metabolism of xenobiotics by cytochrome P450                                                   |
| 2.90E-03 | 2 | 5   | L-arginine transmembrane transport                                                             |
| 2.90E-03 | 2 | 5   | L-ornithine transmembrane transporter activity                                                 |
| 2.90E-03 | 2 | 5   | L-lysine transmembrane transporter activity                                                    |
| 2.90E-03 | 3 | 28  | GeneSetDB:MATADOR melphalan                                                                    |
| 2.90E-03 | 2 | 5   | DrugBank:CHEBI:18019                                                                           |
| 3.90E-03 | 2 | 6   | Ornithine transport                                                                            |
| 3.90E-03 | 2 | 6   | L-lysine transport                                                                             |
| 3.90E-03 | 2 | 6   | L-ornithine transmembrane transport                                                            |
| 3.90E-03 | 2 | 6   | L-lysine transmembrane transport                                                               |
| 3.90E-03 | 2 | 6   | Arginine transmembrane transport                                                               |

|          |   |     |                                                     |
|----------|---|-----|-----------------------------------------------------|
| 3.90E-03 | 2 | 6   | Carbonyl reductase (NADPH) activity                 |
| 3.90E-03 | 2 | 6   | Arginine transmembrane transporter activity         |
| 4.90E-03 | 4 | 90  | Wiki:GPCRs, Other                                   |
| 5.00E-03 | 2 | 7   | Recon X:CHEBI                                       |
| 5.00E-03 | 2 | 7   | Recon X:CHEBI                                       |
| 5.00E-03 | 2 | 7   | Recon X:CHEBI                                       |
| 5.00E-03 | 2 | 7   | Recon X:CHEBI                                       |
| 5.00E-03 | 2 | 7   | L-arginine transport                                |
| 5.00E-03 | 2 | 7   | CTD:CHEBI                                           |
| 5.60E-03 | 3 | 38  | DrugBank:CHEBI:16856                                |
| 5.90E-03 | 8 | 530 | MSigDB:chr19p13                                     |
| 6.30E-03 | 2 | 8   | Recon X:CHEBI                                       |
| 6.30E-03 | 2 | 8   | Recon X:CHEBI                                       |
| 7.70E-03 | 2 | 9   | Recon X:CHEBI                                       |
| 7.70E-03 | 2 | 9   | Arginine transport                                  |
| 7.70E-03 | 2 | 9   | Basic amino acid transmembrane transport            |
| 9.10E-03 | 4 | 111 | Long-chain fatty acid metabolic process             |
| 9.20E-03 | 2 | 10  | Recon X:CHEBI                                       |
| 9.20E-03 | 2 | 10  | Recon X:CHEBI                                       |
| 9.20E-03 | 2 | 10  | Recon X:CHEBI                                       |
| 1.10E-02 | 2 | 11  | Recon X:CHEBI                                       |
| 1.10E-02 | 2 | 11  | GeneSetDB:MATADOR acipimox                          |
| 1.10E-02 | 2 | 11  | GeneSetDB:MATADOR pantethine                        |
| 1.30E-02 | 3 | 53  | Glutathione metabolic process                       |
| 1.30E-02 | 2 | 12  | Basic amino acid transmembrane transporter activity |
| 1.30E-02 | 2 | 12  | CTD:CHEBI                                           |
| 1.30E-02 | 3 | 54  | Glutathione metabolism                              |
| 1.30E-02 | 5 | 222 | Reactome:R-HSA-211859 Biological oxidations         |
| 1.30E-02 | 3 | 55  | MiRTarBase:hsa-miR-5011-3p                          |
| 1.40E-02 | 2 | 13  | CTD:CHEBI                                           |
| 1.50E-02 | 2 | 15  | IntAct:MPDZ                                         |
| 1.50E-02 | 2 | 15  | Recon X:BTB                                         |
| 1.50E-02 | 2 | 17  | Recon X:CHEBI                                       |
| 1.50E-02 | 2 | 15  | Recon X:CHEBI                                       |
| 1.50E-02 | 2 | 14  | Recon X:CHEBI                                       |
| 1.50E-02 | 2 | 16  | Recon X:CHEBI                                       |
| 1.50E-02 | 2 | 17  | Recon X:TPSAB1                                      |
| 1.50E-02 | 2 | 17  | Recon X:TPSB2                                       |
| 1.50E-02 | 2 | 17  | Recon X:TPSD1                                       |
| 1.50E-02 | 3 | 59  | Reactome:R-HSA-2142753 Arachidonic acid metabolism  |
| 1.50E-02 | 2 | 15  | Reactome:R-HSA-211935 Fatty acids                   |
| 1.50E-02 | 4 | 143 | Wiki:NRF2 pathway                                   |
| 1.50E-02 | 6 | 382 | Sulfur compound metabolic process                   |

|          |   |     |                                                                        |
|----------|---|-----|------------------------------------------------------------------------|
| 1.50E-02 | 2 | 14  | Basic amino acid transport                                             |
| 1.50E-02 | 2 | 18  | Acyl-CoA hydrolase activity                                            |
| 1.50E-02 | 3 | 62  | Arachidonic acid metabolism                                            |
| 1.50E-02 | 4 | 138 | GeneSetDB:EHMN Tyrosine metabolism                                     |
| 1.50E-02 | 2 | 18  | GeneSetDB:EHMN Vitamin E metabolism                                    |
| 1.50E-02 | 2 | 17  | GeneSetDB:MATADOR 19-nortestosterone                                   |
| 1.50E-02 | 4 | 140 | GeneSetDB:MATADOR clofibrate                                           |
| 1.50E-02 | 2 | 18  | GeneSetDB:MATADOR doxazosin                                            |
| 1.50E-02 | 2 | 15  | GeneSetDB:MATADOR Ronicol                                              |
| 1.50E-02 | 2 | 16  | GeneSetDB:MATADOR Triton WR-1339                                       |
| 1.50E-02 | 2 | 18  | GeneSetDB:STITCH C14865(CID011954073)                                  |
| 1.50E-02 | 2 | 18  | GeneSetDB:STITCH C14865(CID111954073)                                  |
| 1.50E-02 | 2 | 18  | GeneSetDB:T3DB Antimony                                                |
| 1.50E-02 | 2 | 18  | GeneSetDB:T3DB Antimony(III) ethoxide                                  |
| 1.50E-02 | 2 | 18  | GeneSetDB:T3DB Antimony(III) isopropoxide                              |
| 1.50E-02 | 2 | 18  | GeneSetDB:T3DB Antimony acetate                                        |
| 1.50E-02 | 2 | 18  | GeneSetDB:T3DB Antimony monosulfide                                    |
| 1.50E-02 | 2 | 18  | GeneSetDB:T3DB Antimony pentachloride                                  |
| 1.50E-02 | 2 | 18  | GeneSetDB:T3DB Antimony pentasulfide                                   |
| 1.50E-02 | 2 | 18  | GeneSetDB:T3DB Antimony pentoxide                                      |
| 1.50E-02 | 2 | 18  | GeneSetDB:T3DB Antimony tetramer                                       |
| 1.50E-02 | 2 | 18  | GeneSetDB:T3DB Antimony tribromide                                     |
| 1.50E-02 | 2 | 18  | GeneSetDB:T3DB Antimony trichloride                                    |
| 1.50E-02 | 2 | 18  | GeneSetDB:T3DB Antimony trioxide                                       |
| 1.50E-02 | 2 | 18  | GeneSetDB:T3DB Antimony triselenide                                    |
| 1.50E-02 | 2 | 18  | GeneSetDB:T3DB Antimony trisulfide                                     |
| 1.50E-02 | 2 | 18  | GeneSetDB:T3DB Chlorofluorotrimethylantimony                           |
| 1.50E-02 | 2 | 18  | GeneSetDB:T3DB Chlorohydroxytriphenylantimony                          |
| 1.50E-02 | 2 | 18  | GeneSetDB:T3DB Diantimony diselenide                                   |
| 1.50E-02 | 2 | 18  | GeneSetDB:T3DB Diantimony tetrasulfide                                 |
| 1.50E-02 | 2 | 18  | GeneSetDB:T3DB Dibromotributylantimony                                 |
| 1.50E-02 | 2 | 18  | GeneSetDB:T3DB Dichlorotribenzylantimony                               |
| 1.50E-02 | 2 | 18  | GeneSetDB:T3DB Dioxygenyl hexafluoroantimonate                         |
| 1.50E-02 | 2 | 18  | GeneSetDB:T3DB Diphenyl(o-tolyl)antimony                               |
| 1.50E-02 | 2 | 18  | GeneSetDB:T3DB Hexafluoroantimonic acid                                |
| 1.50E-02 | 2 | 18  | GeneSetDB:T3DB Lithium hexafluoroantimonate(V)                         |
| 1.50E-02 | 2 | 18  | GeneSetDB:T3DB Magic acid (fluorosulfuric acid-antimony pentafluoride) |
| 1.50E-02 | 2 | 18  | GeneSetDB:T3DB Nitronium hexafluoroantimonate(V)                       |
| 1.50E-02 | 2 | 18  | GeneSetDB:T3DB Nitrosonium (nitrosyl) hexafluoroantimonate             |
| 1.50E-02 | 2 | 18  | GeneSetDB:T3DB Potassium antimonyl tartrate trihydrate                 |
| 1.50E-02 | 2 | 18  | GeneSetDB:T3DB Potassium hexafluoroantimonate(V)                       |
| 1.50E-02 | 2 | 18  | GeneSetDB:T3DB Potassium hexahydroxoantimonate(V)                      |

|          |   |     |                                                                |
|----------|---|-----|----------------------------------------------------------------|
| 1.50E-02 | 2 | 18  | GeneSetDB:T3DB Potassium pyroantimonate                        |
| 1.50E-02 | 2 | 18  | GeneSetDB:T3DB Sodium hexafluoroantimonate                     |
| 1.50E-02 | 2 | 18  | GeneSetDB:T3DB Sodium thioantimonate(V)                        |
| 1.50E-02 | 2 | 18  | GeneSetDB:T3DB Stibine                                         |
| 1.50E-02 | 2 | 18  | GeneSetDB:T3DB Tetrabutylantimony(V) bromide                   |
| 1.50E-02 | 2 | 18  | GeneSetDB:T3DB Tetraphenylantimony bromide                     |
| 1.50E-02 | 2 | 18  | GeneSetDB:T3DB Triantimony disulfide                           |
| 1.50E-02 | 2 | 18  | GeneSetDB:T3DB Triethyloxonium hexachloroantimonate            |
| 1.50E-02 | 2 | 18  | GeneSetDB:T3DB Trimethylantimony bromide                       |
| 1.50E-02 | 2 | 18  | GeneSetDB:T3DB Trimethylantimony dichloride                    |
| 1.50E-02 | 2 | 18  | GeneSetDB:T3DB Trimethylantimony diiodide                      |
| 1.50E-02 | 2 | 18  | GeneSetDB:T3DB Trimethyloxonium hexachlorantimonate            |
| 1.50E-02 | 2 | 18  | GeneSetDB:T3DB Triphenylantimony                               |
| 1.50E-02 | 2 | 18  | GeneSetDB:T3DB Triphenylantimony diacetate                     |
| 1.50E-02 | 2 | 18  | GeneSetDB:T3DB Triphenylantimony dibenzoate                    |
| 1.50E-02 | 2 | 18  | GeneSetDB:T3DB Triphenylantimony dichloride                    |
| 1.50E-02 | 2 | 18  | GeneSetDB:T3DB Triphenylcarbenium hexachloroantimonate         |
| 1.50E-02 | 2 | 18  | GeneSetDB:T3DB Triphenylthioantimonate                         |
| 1.50E-02 | 2 | 18  | GeneSetDB:T3DB Tris(1-naphthyl)antimony                        |
| 1.50E-02 | 2 | 18  | GeneSetDB:T3DB Tris(3-(trifluoromethyl)phenyl)antimony         |
| 1.50E-02 | 2 | 18  | GeneSetDB:T3DB Tris(4-bromophenyl)aminium hexachloroantimonate |
| 1.50E-02 | 2 | 18  | GeneSetDB:T3DB Tris(4-bromophenyl)antimony                     |
| 1.50E-02 | 2 | 18  | GeneSetDB:T3DB Tris(dimethylamino)antimony                     |
| 1.50E-02 | 2 | 18  | GeneSetDB:T3DB Tris(o-tolyl)antimony                           |
| 1.50E-02 | 2 | 18  | GeneSetDB:T3DB Tris(p-tolyl)antimony                           |
| 1.50E-02 | 2 | 17  | ITFP:CLIC2                                                     |
| 1.50E-02 | 3 | 63  | MSigDB:LEE LIVER CANCER ACOX1 UP                               |
| 1.50E-02 | 4 | 134 | MSigDB:SERVITJA LIVER HNF1A TARGETS UP                         |
| 1.50E-02 | 2 | 15  | MSigDB:MODULE 431                                              |
| 1.50E-02 | 2 | 17  | SMPDB:Doxorubicin Metabolism Pathway                           |
| 1.50E-02 | 2 | 14  | DrugBank:CHEBI:15729                                           |
| 1.50E-02 | 4 | 157 | MSigDB:HALLMARK FATTY ACID METABOLISM                          |
| 1.50E-02 | 2 | 19  | Recon X:CPA1                                                   |
| 1.50E-02 | 2 | 19  | Recon X:CPA2                                                   |
| 1.50E-02 | 2 | 19  | Recon X:CPA6                                                   |
| 1.50E-02 | 2 | 19  | GeneSetDB:STITCH bromoacetaldehyde(CID000105131)               |
| 1.50E-02 | 2 | 19  | GeneSetDB:STITCH bromoacetaldehyde(CID100105131)               |
| 1.50E-02 | 2 | 19  | GeneSetDB:STITCH DNP-SG(CID000097535)                          |
| 1.50E-02 | 2 | 19  | GeneSetDB:STITCH DNP-SG(CID100097535)                          |
| 1.50E-02 | 2 | 19  | GeneSetDB:T3DB Zinc antimonide                                 |

|          |   |     |                                                             |
|----------|---|-----|-------------------------------------------------------------|
| 1.60E-02 | 2 | 20  | Recon X:CHEBI                                               |
| 1.60E-02 | 2 | 20  | CoA hydrolase activity                                      |
| 1.60E-02 | 2 | 20  | GeneSetDB:MATADOR ciprofibrate                              |
| 1.60E-02 | 2 | 20  | GeneSetDB:MATADOR glibenclamide                             |
| 1.60E-02 | 2 | 20  | GeneSetDB:MATADOR rosuvastatin                              |
| 1.60E-02 | 2 | 20  | GeneSetDB:MATADOR tibolone                                  |
| 1.60E-02 | 2 | 20  | GeneSetDB:STITCH 1,1-dichloroethylene epoxide(CID000119521) |
| 1.60E-02 | 2 | 20  | GeneSetDB:STITCH 1,1-dichloroethylene epoxide(CID100119521) |
| 1.60E-02 | 2 | 20  | GeneSetDB:STITCH chloroacetyl chloride(CID000006577)        |
| 1.60E-02 | 2 | 20  | GeneSetDB:STITCH chloroacetyl chloride(CID100006577)        |
| 1.60E-02 | 2 | 20  | GeneSetDB:T3DB Aluminium antimonide                         |
| 1.60E-02 | 2 | 20  | GeneSetDB:T3DB Dichlorotris(4-bromophenyl)antimony          |
| 1.70E-02 | 3 | 77  | MSigDB:SANA RESPONSE TO IFNG UP                             |
| 1.70E-02 | 2 | 21  | Recon X:ACE2                                                |
| 1.70E-02 | 2 | 21  | GeneSetDB:STITCH 2,2-dichloroacetaldehyde(CID000006576)     |
| 1.70E-02 | 2 | 21  | GeneSetDB:STITCH 2,2-dichloroacetaldehyde(CID100006576)     |
| 1.70E-02 | 2 | 21  | GeneSetDB:STITCH bromobenzene-3,4-oxide(CID000108121)       |
| 1.70E-02 | 2 | 21  | GeneSetDB:STITCH bromobenzene-3,4-oxide(CID100108121)       |
| 1.70E-02 | 2 | 21  | GeneSetDB:STITCH bromobenzene 2,3-epoxide(CID003036760)     |
| 1.70E-02 | 2 | 21  | GeneSetDB:STITCH bromobenzene 2,3-epoxide(CID103036760)     |
| 1.70E-02 | 2 | 21  | GeneSetDB:T3DB Antimony potassium tartate                   |
| 1.70E-02 | 2 | 21  | MSigDB:YANG MUC2 TARGETS DUODENUM 6MO DN                    |
| 1.80E-02 | 2 | 22  | Wiki:Glutathione metabolism                                 |
| 1.80E-02 | 2 | 22  | Amino acid import across plasma membrane                    |
| 1.80E-02 | 3 | 81  | Chemical carcinogenesis                                     |
| 1.80E-02 | 3 | 81  | GeneSetDB:EHMN Tryptophan metabolism                        |
| 1.80E-02 | 2 | 22  | GeneSetDB:STITCH ethylene dibromide(CID000007839)           |
| 1.80E-02 | 2 | 22  | GeneSetDB:STITCH ethylene dibromide(CID100007839)           |
| 1.80E-02 | 3 | 81  | MSigDB:SANA TNF SIGNALING UP                                |
| 1.80E-02 | 2 | 22  | MSigDB:MODULE 310                                           |
| 1.80E-02 | 2 | 22  | Inoh:Cystinosis, ocular nonnephropathic                     |
| 1.80E-02 | 3 | 82  | MSigDB:chr1q44                                              |
| 1.80E-02 | 4 | 175 | Wiki:Metapathway biotransformation Phase I and II           |
| 1.90E-02 | 3 | 83  | GeneSetDB:EHMN Xenobiotics metabolism                       |
| 1.90E-02 | 2 | 23  | Glutathione derivative metabolic process                    |

|          |   |     |                                                                                           |
|----------|---|-----|-------------------------------------------------------------------------------------------|
| 1.90E-02 | 2 | 23  | Glutathione derivative biosynthetic process                                               |
| 1.90E-02 | 2 | 23  | GeneSetDB:STITCH C14802(CID011954053)                                                     |
| 1.90E-02 | 2 | 23  | GeneSetDB:STITCH C14802(CID111954053)                                                     |
| 1.90E-02 | 2 | 23  | MSigDB:YANG MUC2 TARGETS DUODENUM 3MO DN                                                  |
| 2.00E-02 | 2 | 24  | Recon X:SLC16A10                                                                          |
| 2.00E-02 | 2 | 24  | GeneSetDB:MATADOR gemfibrozil                                                             |
| 2.00E-02 | 2 | 24  | GeneSetDB:STITCH C14800(CID011954051)                                                     |
| 2.00E-02 | 2 | 24  | GeneSetDB:STITCH C14800(CID111954051)                                                     |
| 2.10E-02 | 2 | 25  | Recon X:CHEBI                                                                             |
| 2.10E-02 | 2 | 25  | Amino acid import                                                                         |
| 2.10E-02 | 2 | 25  | GeneSetDB:EHMN De novo fatty acid biosynthesis                                            |
| 2.10E-02 | 2 | 25  | GeneSetDB:STITCH (1S,2R)-naphthalene 1,2-oxide(CID011094749)                              |
| 2.10E-02 | 2 | 25  | GeneSetDB:STITCH (1S,2R)-naphthalene 1,2-oxide(CID100108063)                              |
| 2.10E-02 | 2 | 25  | GeneSetDB:STITCH C14786(CID000155957)                                                     |
| 2.10E-02 | 4 | 186 | MSigDB:GSE1566 WT VS EZH2 KO LN TCELL DN                                                  |
| 2.10E-02 | 4 | 185 | MSigDB:GSE42021 CD24INT VS CD24LOW TCONV THYMUS UP                                        |
| 2.10E-02 | 2 | 25  | Humancyc:Guanidinoacetate Methyltransferase Deficiency (GAMT Deficiency)                  |
| 2.10E-02 | 4 | 187 | MSigDB:KONDO PROSTATE CANCER WITH H3K27ME3                                                |
| 2.20E-02 | 2 | 26  | GeneSetDB:EHMN Putative anti-Inflammatory metabolites formation from EPA                  |
| 2.20E-02 | 4 | 190 | MSigDB:GSE37533 PPARG2 FOXP3 VS FOXP3 TRANSDUCED CD4 TCELL DN                             |
| 2.20E-02 | 4 | 190 | MSigDB:GSE42021 CD24HI VS CD24LOW TCONV THYMUS DN                                         |
| 2.30E-02 | 4 | 191 | MSigDB:GSE42021 CD24HI VS CD24INT TCONV THYMUS DN                                         |
| 2.30E-02 | 4 | 192 | MSigDB:GSE42021 TREG VS TCONV PLN UP                                                      |
| 2.30E-02 | 4 | 193 | MSigDB:GSE37533 PPARG1 FOXP3 VS FOXP3 TRANSDUCED CD4 TCELL DN                             |
| 2.30E-02 | 4 | 193 | MSigDB:GSE37533 PPARG1 FOXP3 VS PPARG2 FOXP3 TRANSDUCED CD4 TCELL PIOGLITAZONE TREATED DN |
| 2.30E-02 | 3 | 94  | GeneSetDB:STITCH reduced glutathione(CID000124886)                                        |
| 2.30E-02 | 2 | 27  | GeneSetDB:STITCH trichloroethene(CID000006575)                                            |
| 2.30E-02 | 2 | 27  | GeneSetDB:STITCH trichloroethene(CID100006575)                                            |
| 2.30E-02 | 4 | 194 | MSigDB:GSE42021 CD24HI VS CD24INT TREG THYMUS DN                                          |
| 2.50E-02 | 2 | 28  | GeneSetDB:STITCH aldophosphamide(CID000107744)                                            |
| 2.50E-02 | 2 | 28  | GeneSetDB:STITCH aldophosphamide(CID100107744)                                            |
| 2.50E-02 | 3 | 96  | GeneSetDB:STITCH reduced glutathione(CID100000745)                                        |
| 2.50E-02 | 2 | 28  | GeneSetDB:T3DB Silver(I) hexafluoroantimonate                                             |



|          |   |     |                                                                                                    |
|----------|---|-----|----------------------------------------------------------------------------------------------------|
| 2.50E-02 | 2 | 28  | GeneSetDB:MPO abnormal social/conspecific interaction                                              |
| 2.50E-02 | 2 | 28  | CTD:CHEBI                                                                                          |
| 2.60E-02 | 3 | 98  | GeneSetDB:EHMN Androgen and estrogen biosynthesis and metabolism                                   |
| 2.60E-02 | 2 | 29  | Glutathione transferase activity                                                                   |
| 2.80E-02 | 2 | 30  | GeneSetDB:STITCH benzo[a]pyrene 4,5-oxide(CID000037786)                                            |
| 2.80E-02 | 2 | 30  | GeneSetDB:STITCH benzo[a]pyrene 4,5-oxide(CID100037786)                                            |
| 2.90E-02 | 2 | 31  | Recon X:SLC43A1                                                                                    |
| 3.10E-02 | 3 | 106 | Reactome:R-HSA-211945 Phase I - Functionalization of compounds                                     |
| 3.10E-02 | 2 | 32  | GeneSetDB:MATADOR estrogen                                                                         |
| 3.10E-02 | 3 | 106 | CTD:KEAP1                                                                                          |
| 3.30E-02 | 2 | 33  | Reactome:R-HSA-352230 Amino acid transport across the plasma membrane                              |
| 3.40E-02 | 7 | 671 | Reactome:R-HSA-109582 Hemostasis                                                                   |
| 3.50E-02 | 2 | 34  | GeneSetDB:STITCH NSC647529(CID000000745)                                                           |
| 3.60E-02 | 3 | 112 | GeneSetDB:EHMN Urea cycle and metabolism of arginine, proline, glutamate, aspartate and asparagine |
| 3.60E-02 | 2 | 35  | GeneSetDB:MATADOR fluvastatin                                                                      |
| 3.60E-02 | 2 | 35  | GeneSetDB:MATADOR probucol                                                                         |
| 3.80E-02 | 2 | 36  | GeneSetDB:STITCH 1-chloro-2,4-dinitrobenzene(CID000000006)                                         |
| 3.80E-02 | 2 | 36  | GeneSetDB:STITCH 1-chloro-2,4-dinitrobenzene(CID100000006)                                         |
| 3.80E-02 | 2 | 36  | MSigDB:CERIBELLI GENES INACTIVE AND BOUND BY NFY                                                   |
| 3.80E-02 | 3 | 116 | Recon X:SLC5A10                                                                                    |
| 3.80E-02 | 3 | 116 | Recon X:SLC5A12                                                                                    |
| 3.80E-02 | 3 | 116 | Recon X:SLC5A2                                                                                     |
| 3.80E-02 | 3 | 116 | Icosanoid metabolic process                                                                        |
| 3.90E-02 | 2 | 37  | Reactome:R-HSA-156590 Glutathione conjugation                                                      |
| 3.90E-02 | 2 | 37  | Reactome:R-HSA-77289 Mitochondrial Fatty Acid Beta-Oxidation                                       |
| 3.90E-02 | 2 | 37  | GeneSetDB:STITCH benzo[a]pyrene-7,8-dihydrodiol(CID000025892)                                      |
| 3.90E-02 | 2 | 37  | GeneSetDB:STITCH benzo[a]pyrene-7,8-dihydrodiol(CID100025892)                                      |
| 3.90E-02 | 2 | 37  | MSigDB:MODULE 286                                                                                  |
| 4.10E-02 | 2 | 38  | Oxygen binding                                                                                     |
| 4.10E-02 | 3 | 120 | Xenobiotic metabolic process                                                                       |
| 4.20E-02 | 3 | 122 | Recon X:SLC3A1                                                                                     |
| 4.20E-02 | 3 | 122 | Recon X:SLC5A3                                                                                     |
| 4.20E-02 | 3 | 122 | MiRTarBase:hsa-miR-5694                                                                            |
| 4.50E-02 | 5 | 384 | Fatty acid metabolic process                                                                       |

|          |   |     |                                                   |
|----------|---|-----|---------------------------------------------------|
| 4.60E-02 | 3 | 126 | Recon X:SLC27A5                                   |
| 4.60E-02 | 3 | 126 | Recon X:SLC5A9                                    |
| 4.60E-02 | 7 | 722 | Reactome:R-HSA-5653656 Vesicle-mediated transport |
| 4.80E-02 | 2 | 42  | Recon X:MLYCD                                     |
| 4.90E-02 | 4 | 251 | MSigDB:chr12q13                                   |
| 5.00E-02 | 3 | 131 | Recon X:ALDH3A1                                   |
| 5.00E-02 | 3 | 131 | Amino acid transport                              |

**Table S7.** Enrichment of genes extremely differentiated by copy number ( $V_{ST} > 0.35$ ) between brown bear and polar bear. Enrichment analysis was conducted via ShinyGoV0.51 (<http://bioinformatics.sdstate.edu/go/>).

| Enrichment FDR | Genes in list | Total genes | Functional Category                                                    |
|----------------|---------------|-------------|------------------------------------------------------------------------|
| 9.30E-23       | 21            | 429         | Olfactory transduction                                                 |
| 1.30E-21       | 20            | 429         | Reactome:R-HSA-381753 Olfactory Signaling Pathway                      |
| 1.30E-21       | 21            | 516         | Detection of chemical stimulus involved in sensory perception of smell |
| 1.30E-21       | 21            | 516         | Olfactory receptor activity                                            |
| 3.20E-21       | 21            | 548         | Sensory perception of smell                                            |
| 1.20E-20       | 21            | 588         | Detection of chemical stimulus involved in sensory perception          |
| 3.80E-20       | 21            | 627         | Detection of chemical stimulus                                         |
| 5.80E-20       | 21            | 644         | Detection of stimulus involved in sensory perception                   |
| 5.80E-20       | 21            | 648         | Sensory perception of chemical stimulus                                |
| 1.50E-19       | 20            | 571         | Reactome:R-HSA-418555 G alpha (s) signalling events                    |
| 5.60E-18       | 21            | 816         | Detection of stimulus                                                  |
| 3.70E-16       | 21            | 1006        | G protein-coupled receptor activity                                    |
| 2.50E-15       | 21            | 1110        | Sensory perception                                                     |
| 9.90E-14       | 20            | 1155        | Reactome:R-HSA-388396 GPCR downstream signalling                       |
| 1.70E-13       | 22            | 1582        | Transmembrane signaling receptor activity                              |
| 1.80E-13       | 22            | 1589        | Nervous system process                                                 |
| 2.10E-13       | 20            | 1215        | Reactome:R-HSA-372790 Signaling by GPCR                                |
| 1.40E-12       | 21            | 1546        | G protein-coupled receptor signaling pathway                           |
| 3.50E-12       | 22            | 1850        | Signaling receptor activity                                            |
| 6.30E-12       | 22            | 1910        | Molecular transducer activity                                          |
| 2.90E-11       | 23            | 2321        | System process                                                         |
| 5.60E-09       | 22            | 2690        | Reactome:R-HSA-162582 Signal Transduction                              |
| 3.00E-08       | 7             | 101         | GeneSetDB:EHMN Leukotriene metabolism                                  |
| 7.20E-07       | 6             | 91          | GeneSetDB:EHMN Arachidonic acid metabolism                             |
| 4.30E-05       | 4             | 41          | GeneSetDB:EHMN Prostaglandin formation from arachidonate               |
| 1.50E-04       | 2             | 2           | Recon X:LTA4H                                                          |
| 2.70E-04       | 6             | 254         | Wiki:GPCRs, Class A Rhodopsin-like                                     |
| 3.60E-04       | 3             | 22          | GeneSetDB:MATADOR acarbose                                             |
| 3.90E-04       | 4             | 73          | Metabolism of xenobiotics by cytochrome P450                           |
| 3.90E-04       | 2             | 3           | Recon X:CHEBI                                                          |
| 7.60E-04       | 2             | 4           | Recon X:ALOX12                                                         |
| 7.70E-04       | 4             | 89          | Reactome:R-HSA-2168880 Scavenging of heme from plasma                  |
| 1.50E-03       | 7             | 530         | MSigDB:chr19p13                                                        |
| 1.70E-03       | 5             | 222         | Reactome:R-HSA-211859 Biological oxidations                            |
| 1.70E-03       | 2             | 6           | Carbonyl reductase (NADPH) activity                                    |

|          |   |     |                                                                             |
|----------|---|-----|-----------------------------------------------------------------------------|
| 2.00E-03 | 2 | 7   | Recon X:CHEBI                                                               |
| 2.00E-03 | 2 | 7   | Recon X:CHEBI                                                               |
| 2.00E-03 | 2 | 7   | Recon X:CHEBI                                                               |
| 2.00E-03 | 2 | 7   | Recon X:CHEBI                                                               |
| 2.00E-03 | 4 | 118 | Reactome:R-HSA-2173782 Binding and Uptake of Ligands by Scavenger Receptors |
| 2.60E-03 | 2 | 8   | Recon X:CHEBI                                                               |
| 2.60E-03 | 2 | 8   | Recon X:CHEBI                                                               |
| 3.20E-03 | 2 | 9   | Recon X:CHEBI                                                               |
| 3.20E-03 | 4 | 138 | GeneSetDB:EHMN Tyrosine metabolism                                          |
| 3.20E-03 | 4 | 140 | GeneSetDB:MATADOR clofibrate                                                |
| 3.40E-03 | 4 | 143 | Wiki:NRF2 pathway                                                           |
| 3.60E-03 | 2 | 10  | Recon X:CHEBI                                                               |
| 3.60E-03 | 2 | 10  | Recon X:CHEBI                                                               |
| 3.60E-03 | 2 | 10  | Recon X:CHEBI                                                               |
| 4.10E-03 | 2 | 11  | Recon X:CHEBI                                                               |
| 4.10E-03 | 2 | 11  | GeneSetDB:MATADOR acipimox                                                  |
| 4.10E-03 | 2 | 11  | GeneSetDB:MATADOR pantethine                                                |
| 4.20E-03 | 2 | 15  | IntAct:MPDZ                                                                 |
| 4.20E-03 | 2 | 17  | Recon X:CHEBI                                                               |
| 4.20E-03 | 2 | 15  | Recon X:CHEBI                                                               |
| 4.20E-03 | 2 | 14  | Recon X:CHEBI                                                               |
| 4.20E-03 | 2 | 16  | Recon X:CHEBI                                                               |
| 4.20E-03 | 4 | 180 | Reactome:R-HSA-8978868 Fatty acid metabolism                                |
| 4.20E-03 | 2 | 15  | Reactome:R-HSA-211935 Fatty acids                                           |
| 4.20E-03 | 2 | 18  | Acyl-CoA hydrolase activity                                                 |
| 4.20E-03 | 3 | 62  | Arachidonic acid metabolism                                                 |
| 4.20E-03 | 3 | 81  | Chemical carcinogenesis                                                     |
| 4.20E-03 | 3 | 81  | GeneSetDB:EHMN Tryptophan metabolism                                        |
| 4.20E-03 | 2 | 18  | GeneSetDB:EHMN Vitamin E metabolism                                         |
| 4.20E-03 | 3 | 83  | GeneSetDB:EHMN Xenobiotics metabolism                                       |
| 4.20E-03 | 2 | 17  | GeneSetDB:MATADOR 19-nortestosterone                                        |
| 4.20E-03 | 2 | 18  | GeneSetDB:MATADOR doxazosin                                                 |
| 4.20E-03 | 2 | 15  | GeneSetDB:MATADOR Ronicol                                                   |
| 4.20E-03 | 2 | 16  | GeneSetDB:MATADOR Triton WR-1339                                            |
| 4.20E-03 | 2 | 18  | GeneSetDB:STITCH C14865(CID011954073)                                       |
| 4.20E-03 | 2 | 18  | GeneSetDB:STITCH C14865(CID111954073)                                       |
| 4.20E-03 | 2 | 18  | GeneSetDB:T3DB Antimony                                                     |
| 4.20E-03 | 2 | 18  | GeneSetDB:T3DB Antimony(III) ethoxide                                       |
| 4.20E-03 | 2 | 18  | GeneSetDB:T3DB Antimony(III) isopropoxide                                   |
| 4.20E-03 | 2 | 18  | GeneSetDB:T3DB Antimony acetate                                             |
| 4.20E-03 | 2 | 18  | GeneSetDB:T3DB Antimony monosulfide                                         |
| 4.20E-03 | 2 | 18  | GeneSetDB:T3DB Antimony pentachloride                                       |
| 4.20E-03 | 2 | 18  | GeneSetDB:T3DB Antimony pentasulfide                                        |

|          |   |    |                                                                        |
|----------|---|----|------------------------------------------------------------------------|
| 4.20E-03 | 2 | 18 | GeneSetDB:T3DB Antimony pentoxide                                      |
| 4.20E-03 | 2 | 18 | GeneSetDB:T3DB Antimony tetramer                                       |
| 4.20E-03 | 2 | 18 | GeneSetDB:T3DB Antimony tribromide                                     |
| 4.20E-03 | 2 | 18 | GeneSetDB:T3DB Antimony trichloride                                    |
| 4.20E-03 | 2 | 18 | GeneSetDB:T3DB Antimony trioxide                                       |
| 4.20E-03 | 2 | 18 | GeneSetDB:T3DB Antimony triselenide                                    |
| 4.20E-03 | 2 | 18 | GeneSetDB:T3DB Antimony trisulfide                                     |
| 4.20E-03 | 2 | 18 | GeneSetDB:T3DB Chlorofluorotrimethylantimony                           |
| 4.20E-03 | 2 | 18 | GeneSetDB:T3DB Chlorohydroxytriphenylantimony                          |
| 4.20E-03 | 2 | 18 | GeneSetDB:T3DB Diantimony diselenide                                   |
| 4.20E-03 | 2 | 18 | GeneSetDB:T3DB Diantimony tetrasulfide                                 |
| 4.20E-03 | 2 | 18 | GeneSetDB:T3DB Dibromotributylantimony                                 |
| 4.20E-03 | 2 | 18 | GeneSetDB:T3DB Dichlorotribenzylantimony                               |
| 4.20E-03 | 2 | 18 | GeneSetDB:T3DB Dioxygenyl hexafluoroantimonate                         |
| 4.20E-03 | 2 | 18 | GeneSetDB:T3DB Diphenyl(o-tolyl)antimony                               |
| 4.20E-03 | 2 | 18 | GeneSetDB:T3DB Hexafluoroantimonic acid                                |
| 4.20E-03 | 2 | 18 | GeneSetDB:T3DB Lithium hexafluoroantimonate(V)                         |
| 4.20E-03 | 2 | 18 | GeneSetDB:T3DB Magic acid (fluorosulfuric acid-antimony pentafluoride) |
| 4.20E-03 | 2 | 18 | GeneSetDB:T3DB Nitronium hexafluoroantimonate(V)                       |
| 4.20E-03 | 2 | 18 | GeneSetDB:T3DB Nitrosonium (nitrosyl) hexafluoroantimonate             |
| 4.20E-03 | 2 | 18 | GeneSetDB:T3DB Potassium antimonyl tartrate trihydrate                 |
| 4.20E-03 | 2 | 18 | GeneSetDB:T3DB Potassium hexafluoroantimonate(V)                       |
| 4.20E-03 | 2 | 18 | GeneSetDB:T3DB Potassium hexahydroxoantimonate(V)                      |
| 4.20E-03 | 2 | 18 | GeneSetDB:T3DB Potassium pyroantimonate                                |
| 4.20E-03 | 2 | 18 | GeneSetDB:T3DB Sodium hexafluoroantimonate                             |
| 4.20E-03 | 2 | 18 | GeneSetDB:T3DB Sodium thioantimonate(V)                                |
| 4.20E-03 | 2 | 18 | GeneSetDB:T3DB Stibine                                                 |
| 4.20E-03 | 2 | 18 | GeneSetDB:T3DB Tetrabutylantimony(V) bromide                           |
| 4.20E-03 | 2 | 18 | GeneSetDB:T3DB Tetraphenylantimony bromide                             |
| 4.20E-03 | 2 | 18 | GeneSetDB:T3DB Triantimony disulfide                                   |
| 4.20E-03 | 2 | 18 | GeneSetDB:T3DB Triethyloxonium hexachloroantimonate                    |
| 4.20E-03 | 2 | 18 | GeneSetDB:T3DB Trimethylantimony bromide                               |
| 4.20E-03 | 2 | 18 | GeneSetDB:T3DB Trimethylantimony dichloride                            |
| 4.20E-03 | 2 | 18 | GeneSetDB:T3DB Trimethylantimony diiodide                              |
| 4.20E-03 | 2 | 18 | GeneSetDB:T3DB Trimethyloxonium hexachlorantimonate                    |
| 4.20E-03 | 2 | 18 | GeneSetDB:T3DB Triphenylantimony                                       |
| 4.20E-03 | 2 | 18 | GeneSetDB:T3DB Triphenylantimony diacetate                             |
| 4.20E-03 | 2 | 18 | GeneSetDB:T3DB Triphenylantimony dibenzoate                            |
| 4.20E-03 | 2 | 18 | GeneSetDB:T3DB Triphenylantimony dichloride                            |
| 4.20E-03 | 2 | 18 | GeneSetDB:T3DB Triphenylcarbenium hexachloroantimonate                 |

|          |   |     |                                                                                           |
|----------|---|-----|-------------------------------------------------------------------------------------------|
| 4.20E-03 | 2 | 18  | GeneSetDB:T3DB Triphenylthioantimonate                                                    |
| 4.20E-03 | 2 | 18  | GeneSetDB:T3DB Tris(1-naphthyl)antimony                                                   |
| 4.20E-03 | 2 | 18  | GeneSetDB:T3DB Tris(3-(trifluoromethyl)phenyl)antimony                                    |
| 4.20E-03 | 2 | 18  | GeneSetDB:T3DB Tris(4-bromophenyl)aminium hexachloroantimonate                            |
| 4.20E-03 | 2 | 18  | GeneSetDB:T3DB Tris(4-bromophenyl)antimony                                                |
| 4.20E-03 | 2 | 18  | GeneSetDB:T3DB Tris(dimethylamino)antimony                                                |
| 4.20E-03 | 2 | 18  | GeneSetDB:T3DB Tris(o-tolyl)antimony                                                      |
| 4.20E-03 | 2 | 18  | GeneSetDB:T3DB Tris(p-tolyl)antimony                                                      |
| 4.20E-03 | 3 | 77  | MSigDB:SANA RESPONSE TO IFNG UP                                                           |
| 4.20E-03 | 3 | 81  | MSigDB:SANA TNF SIGNALING UP                                                              |
| 4.20E-03 | 2 | 15  | MSigDB:MODULE 431                                                                         |
| 4.20E-03 | 4 | 193 | MSigDB:GSE37533 PPARG1 FOXP3 VS FOXP3 TRANSDUCED CD4 TCELL DN                             |
| 4.20E-03 | 4 | 190 | MSigDB:GSE37533 PPARG2 FOXP3 VS FOXP3 TRANSDUCED CD4 TCELL DN                             |
| 4.20E-03 | 4 | 193 | MSigDB:GSE37533 PPARG1 FOXP3 VS PPARG2 FOXP3 TRANSDUCED CD4 TCELL PIOGLITAZONE TREATED DN |
| 4.20E-03 | 4 | 192 | MSigDB:GSE42021 TREG VS TCONV PLN UP                                                      |
| 4.20E-03 | 4 | 194 | MSigDB:GSE42021 CD24HI VS CD24INT TREG THYMUS DN                                          |
| 4.20E-03 | 4 | 191 | MSigDB:GSE42021 CD24HI VS CD24INT TCONV THYMUS DN                                         |
| 4.20E-03 | 4 | 190 | MSigDB:GSE42021 CD24HI VS CD24LOW TCONV THYMUS DN                                         |
| 4.20E-03 | 4 | 157 | MSigDB:HALLMARK FATTY ACID METABOLISM                                                     |
| 4.20E-03 | 2 | 17  | SMPDB:Doxorubicin Metabolism Pathway                                                      |
| 4.20E-03 | 2 | 13  | CTD:CHEBI                                                                                 |
| 4.20E-03 | 2 | 12  | CTD:CHEBI                                                                                 |
| 4.20E-03 | 3 | 85  | Reactome:R-HSA-173623 Classical antibody-mediated complement activation                   |
| 4.50E-03 | 2 | 19  | GeneSetDB:STITCH bromoacetaldehyde(CID000105131)                                          |
| 4.50E-03 | 2 | 19  | GeneSetDB:STITCH bromoacetaldehyde(CID100105131)                                          |
| 4.50E-03 | 2 | 19  | GeneSetDB:STITCH DNP-SG(CID000097535)                                                     |
| 4.50E-03 | 2 | 19  | GeneSetDB:STITCH DNP-SG(CID100097535)                                                     |
| 4.50E-03 | 2 | 19  | GeneSetDB:T3DB Zinc antimonide                                                            |
| 4.50E-03 | 2 | 20  | Recon X:CHEBI                                                                             |
| 4.50E-03 | 4 | 211 | Recon X:SLC7A9                                                                            |
| 4.50E-03 | 3 | 91  | Reactome:R-HSA-2029481 FCGR activation                                                    |
| 4.50E-03 | 3 | 89  | Reactome:R-HSA-2730905 Role of LAT2/NTAL/LAB on calcium mobilization                      |
| 4.50E-03 | 3 | 90  | Wiki:GPCRs, Other                                                                         |
| 4.50E-03 | 2 | 20  | CoA hydrolase activity                                                                    |
| 4.50E-03 | 2 | 20  | GeneSetDB:MATADOR ciprofibrate                                                            |

|          |   |     |                                                                  |
|----------|---|-----|------------------------------------------------------------------|
| 4.50E-03 | 2 | 20  | GeneSetDB:MATADOR glibenclamide                                  |
| 4.50E-03 | 2 | 20  | GeneSetDB:MATADOR rosuvastatin                                   |
| 4.50E-03 | 2 | 20  | GeneSetDB:MATADOR tibolone                                       |
| 4.50E-03 | 2 | 20  | GeneSetDB:STITCH 1,1-dichloroethylene epoxide(CID000119521)      |
| 4.50E-03 | 2 | 20  | GeneSetDB:STITCH 1,1-dichloroethylene epoxide(CID100119521)      |
| 4.50E-03 | 2 | 20  | GeneSetDB:STITCH chloroacetyl chloride(CID000006577)             |
| 4.50E-03 | 2 | 20  | GeneSetDB:STITCH chloroacetyl chloride(CID100006577)             |
| 4.50E-03 | 2 | 20  | GeneSetDB:T3DB Aluminium antimonide                              |
| 4.50E-03 | 2 | 20  | GeneSetDB:T3DB Dichlorotris(4-bromophenyl)antimony               |
| 4.50E-03 | 5 | 382 | Sulfur compound metabolic process                                |
| 4.60E-03 | 3 | 93  | Reactome:R-HSA-166786 Creation of C4 and C2 activators           |
| 4.60E-03 | 2 | 21  | GeneSetDB:STITCH 2,2-dichloroacetaldehyde(CID000006576)          |
| 4.60E-03 | 2 | 21  | GeneSetDB:STITCH 2,2-dichloroacetaldehyde(CID100006576)          |
| 4.60E-03 | 2 | 21  | GeneSetDB:STITCH bromobenzene-3,4-oxide(CID000108121)            |
| 4.60E-03 | 2 | 21  | GeneSetDB:STITCH bromobenzene-3,4-oxide(CID100108121)            |
| 4.60E-03 | 2 | 21  | GeneSetDB:STITCH bromobenzene 2,3-epoxide(CID003036760)          |
| 4.60E-03 | 2 | 21  | GeneSetDB:STITCH bromobenzene 2,3-epoxide(CID103036760)          |
| 4.60E-03 | 3 | 94  | GeneSetDB:STITCH reduced glutathione(CID000124886)               |
| 4.60E-03 | 2 | 21  | GeneSetDB:T3DB Antimony potassium tartate                        |
| 4.60E-03 | 2 | 21  | MSigDB:YANG MUC2 TARGETS DUODENUM 6MO DN                         |
| 4.90E-03 | 3 | 96  | GeneSetDB:STITCH reduced glutathione(CID100000745)               |
| 5.00E-03 | 2 | 22  | GeneSetDB:STITCH ethylene dibromide(CID000007839)                |
| 5.00E-03 | 2 | 22  | GeneSetDB:STITCH ethylene dibromide(CID100007839)                |
| 5.00E-03 | 2 | 22  | MSigDB:MODULE 310                                                |
| 5.00E-03 | 2 | 22  | Inoh:Cystinosis, ocular nonnephropathic                          |
| 5.10E-03 | 3 | 98  | GeneSetDB:EHMN Androgen and estrogen biosynthesis and metabolism |
| 5.20E-03 | 3 | 100 | Reactome:R-HSA-166663 Initial triggering of complement           |
| 5.20E-03 | 2 | 23  | Glutathione derivative metabolic process                         |
| 5.20E-03 | 2 | 23  | Glutathione derivative biosynthetic process                      |
| 5.20E-03 | 2 | 23  | GeneSetDB:STITCH C14802(CID011954053)                            |
| 5.20E-03 | 2 | 23  | GeneSetDB:STITCH C14802(CID111954053)                            |
| 5.20E-03 | 2 | 23  | MSigDB:YANG MUC2 TARGETS DUODENUM 3MO DN                         |
| 5.60E-03 | 2 | 24  | GeneSetDB:MATADOR gemfibrozil                                    |

|          |   |     |                                                                          |
|----------|---|-----|--------------------------------------------------------------------------|
| 5.60E-03 | 2 | 24  | GeneSetDB:STITCH C14800(CID011954051)                                    |
| 5.60E-03 | 2 | 24  | GeneSetDB:STITCH C14800(CID111954051)                                    |
| 5.70E-03 | 3 | 104 | Reactome:R-HSA-2871809 FCERI mediated Ca+2 mobilization                  |
| 5.70E-03 | 3 | 104 | Reactome:R-HSA-2029485 Role of phospholipids in phagocytosis             |
| 5.70E-03 | 2 | 25  | Recon X:CHEBI                                                            |
| 5.70E-03 | 3 | 105 | Reactome:R-HSA-2871796 FCERI mediated MAPK activation                    |
| 5.70E-03 | 3 | 106 | Reactome:R-HSA-211945 Phase I - Functionalization of compounds           |
| 5.70E-03 | 2 | 25  | GeneSetDB:EHMN De novo fatty acid biosynthesis                           |
| 5.70E-03 | 2 | 25  | GeneSetDB:STITCH (1S,2R)-naphthalene 1,2-oxide(CID011094749)             |
| 5.70E-03 | 2 | 25  | GeneSetDB:STITCH (1S,2R)-naphthalene 1,2-oxide(CID100108063)             |
| 5.70E-03 | 2 | 25  | GeneSetDB:STITCH C14786(CID000155957)                                    |
| 5.70E-03 | 2 | 25  | Humancyc:Guanidinoacetate Methyltransferase Deficiency (GAMT Deficiency) |
| 5.70E-03 | 3 | 106 | CTD:KEAP1                                                                |
| 6.20E-03 | 2 | 26  | GeneSetDB:EHMN Putative anti-Inflammatory metabolites formation from EPA |
| 6.50E-03 | 3 | 111 | Long-chain fatty acid metabolic process                                  |
| 6.60E-03 | 2 | 27  | GeneSetDB:STITCH trichloroethene(CID000006575)                           |
| 6.60E-03 | 2 | 27  | GeneSetDB:STITCH trichloroethene(CID100006575)                           |
| 6.90E-03 | 2 | 28  | GeneSetDB:STITCH aldophosphamide(CID000107744)                           |
| 6.90E-03 | 2 | 28  | GeneSetDB:STITCH aldophosphamide(CID100107744)                           |
| 6.90E-03 | 2 | 28  | GeneSetDB:T3DB Silver(I) hexafluoroantimonate                            |
| 6.90E-03 | 2 | 28  | CTD:CHEBI                                                                |
| 7.40E-03 | 2 | 29  | Glutathione transferase activity                                         |
| 7.80E-03 | 3 | 120 | Xenobiotic metabolic process                                             |
| 7.80E-03 | 2 | 30  | GeneSetDB:STITCH benzo[a]pyrene 4,5-oxide(CID000037786)                  |
| 7.80E-03 | 2 | 30  | GeneSetDB:STITCH benzo[a]pyrene 4,5-oxide(CID100037786)                  |
| 8.50E-03 | 3 | 124 | Reactome:R-HSA-977606 Regulation of Complement cascade                   |
| 8.80E-03 | 2 | 32  | GeneSetDB:MATADOR estrogen                                               |
| 9.30E-03 | 4 | 281 | MiRDB:hsa-miR-3668                                                       |
| 9.80E-03 | 3 | 131 | Recon X:ALDH3A1                                                          |
| 9.80E-03 | 2 | 34  | GeneSetDB:STITCH NSC647529(CID000000745)                                 |
| 9.80E-03 | 3 | 132 | Lipoprotein metabolic process                                            |
| 9.80E-03 | 3 | 132 | CTD:NFE2L2                                                               |
| 1.00E-02 | 2 | 35  | GeneSetDB:MATADOR fluvastatin                                            |
| 1.00E-02 | 2 | 35  | GeneSetDB:MATADOR probucol                                               |
| 1.00E-02 | 3 | 134 | MSigDB:SERVITJA LIVER HNF1A TARGETS UP                                   |



|          |   |     |                                                                                       |
|----------|---|-----|---------------------------------------------------------------------------------------|
| 1.00E-02 | 3 | 135 | Reactome:R-HSA-166658 Complement cascade                                              |
| 1.10E-02 | 2 | 36  | GeneSetDB:STITCH 1-chloro-2,4-dinitrobenzene(CID000000006)                            |
| 1.10E-02 | 2 | 36  | GeneSetDB:STITCH 1-chloro-2,4-dinitrobenzene(CID100000006)                            |
| 1.10E-02 | 2 | 36  | MSigDB:CERIBELLI GENES INACTIVE AND BOUND BY NFY                                      |
| 1.10E-02 | 2 | 37  | Reactome:R-HSA-156590 Glutathione conjugation                                         |
| 1.10E-02 | 2 | 37  | GeneSetDB:STITCH benzo[a]pyrene-7,8-dihydrodiol(CID000025892)                         |
| 1.10E-02 | 2 | 37  | GeneSetDB:STITCH benzo[a]pyrene-7,8-dihydrodiol(CID100025892)                         |
| 1.10E-02 | 2 | 37  | MSigDB:MODULE 286                                                                     |
| 1.10E-02 | 3 | 140 | Reactome:R-HSA-2029482 Regulation of actin dynamics for phagocytic cup formation      |
| 1.10E-02 | 3 | 140 | Oxidoreductase activity, acting on the CH-OH group of donors, NAD or NADP as acceptor |
| 1.10E-02 | 2 | 38  | Oxygen binding                                                                        |
| 1.10E-02 | 2 | 38  | DrugBank:CHEBI:16856                                                                  |
| 1.30E-02 | 4 | 316 | Wiki:Nuclear Receptors Meta-Pathway                                                   |
| 1.30E-02 | 3 | 151 | Oxidoreductase activity, acting on CH-OH group of donors                              |
| 1.40E-02 | 2 | 42  | Recon X:MLYCD                                                                         |
| 1.40E-02 | 3 | 154 | Reactome:R-HSA-2871837 FCERI mediated NF-kB activation                                |
| 1.40E-02 | 3 | 154 | Heme binding                                                                          |
| 1.50E-02 | 5 | 543 | Cofactor binding                                                                      |
| 1.60E-02 | 2 | 47  | Thiolester hydrolase activity                                                         |
| 1.60E-02 | 3 | 164 | Tetrapyrrole binding                                                                  |
| 1.60E-02 | 2 | 47  | GeneSetDB:EHMN Bile acid biosynthesis                                                 |
| 1.60E-02 | 2 | 47  | GeneSetDB:MATADOR desogestrel                                                         |
| 1.60E-02 | 2 | 47  | GeneSetDB:MATADOR pioglitazone                                                        |
| 1.60E-02 | 3 | 165 | Reactome:R-HSA-2029480 Fcgamma receptor (FCGR) dependent phagocytosis                 |
| 1.70E-02 | 2 | 48  | GeneSetDB:MATADOR aminoglutethimide                                                   |
| 1.70E-02 | 2 | 48  | GeneSetDB:MATADOR chloral hydrate                                                     |
| 1.70E-02 | 2 | 48  | GeneSetDB:MATADOR diosmetin                                                           |
| 1.70E-02 | 2 | 48  | GeneSetDB:MATADOR ethylmorphine                                                       |
| 1.70E-02 | 2 | 48  | GeneSetDB:MATADOR hexobarbital                                                        |
| 1.70E-02 | 2 | 48  | GeneSetDB:MATADOR streptozotocin                                                      |
| 1.70E-02 | 2 | 48  | GeneSetDB:MATADOR tienilic acid                                                       |
| 1.70E-02 | 2 | 49  | GeneSetDB:MATADOR 8-methoxypsoralen                                                   |
| 1.70E-02 | 2 | 49  | GeneSetDB:MATADOR carteolol                                                           |
| 1.70E-02 | 2 | 49  | GeneSetDB:MATADOR lansoprazole                                                        |
| 1.70E-02 | 2 | 49  | GeneSetDB:MATADOR metyrapone                                                          |
| 1.70E-02 | 2 | 49  | GeneSetDB:MATADOR trimipramine                                                        |
| 1.70E-02 | 2 | 49  | GeneSetDB:STITCH an aldehyde(CID0000000712)                                           |

|          |   |     |                                                                       |
|----------|---|-----|-----------------------------------------------------------------------|
| 1.80E-02 | 2 | 50  | GeneSetDB:MATADOR diclofenac                                          |
| 1.80E-02 | 2 | 51  | GeneSetDB:MATADOR tolbutamide                                         |
| 1.80E-02 | 2 | 51  | GeneSetDB:MATADOR toremifene                                          |
| 1.80E-02 | 2 | 51  | MSigDB:KRIEG HYPOXIA VIA KDM3A                                        |
| 1.80E-02 | 3 | 175 | Wiki:Metapathway biotransformation Phase I and II                     |
| 1.90E-02 | 5 | 589 | Cofactor metabolic process                                            |
| 1.90E-02 | 3 | 178 | Cellular response to xenobiotic stimulus                              |
| 1.90E-02 | 2 | 53  | Glutathione metabolic process                                         |
| 1.90E-02 | 2 | 53  | Arachidonic acid metabolic process                                    |
| 2.00E-02 | 2 | 54  | Glutathione metabolism                                                |
| 2.00E-02 | 2 | 54  | GeneSetDB:MATADOR propoxyphene                                        |
| 2.00E-02 | 2 | 55  | Peroxisomal matrix                                                    |
| 2.00E-02 | 2 | 55  | Microbody lumen                                                       |
| 2.00E-02 | 3 | 185 | MSigDB:GSE42021 CD24INT VS CD24LOW TCONV THYMUS UP                    |
| 2.10E-02 | 2 | 56  | Recon X:SLCO1A2                                                       |
| 2.10E-02 | 3 | 186 | MSigDB:GSE17721 LPS VS POLYIC 6H BMDC UP                              |
| 2.10E-02 | 3 | 186 | MSigDB:GSE21379 WT VS SAP KO TFH CD4 TCELL UP                         |
| 2.10E-02 | 3 | 188 | MSigDB:GSE1460 CD4 THYMOCYTE VS NAIVE CD4 TCELL ADULT BLOOD DN        |
| 2.10E-02 | 2 | 57  | Recon X:ABCD1                                                         |
| 2.10E-02 | 2 | 57  | GeneSetDB:MATADOR lovastatin                                          |
| 2.10E-02 | 3 | 190 | MSigDB:GSE1432 1H VS 24H IFNG MICROGLIA DN                            |
| 2.10E-02 | 3 | 190 | MSigDB:GSE23925 LIGHT ZONE VS DARK ZONE BCELL UP                      |
| 2.10E-02 | 2 | 58  | GeneSetDB:MATADOR alprazolam                                          |
| 2.10E-02 | 3 | 191 | MSigDB:GSE10325 BCELL VS LUPUS BCELL DN                               |
| 2.10E-02 | 3 | 191 | MSigDB:GSE24634 IL4 VS CTRL TREATED NAIVE CD4 TCELL DAY3 DN           |
| 2.10E-02 | 2 | 59  | Reactome:R-HSA-2142753 Arachidonic acid metabolism                    |
| 2.10E-02 | 4 | 384 | Fatty acid metabolic process                                          |
| 2.10E-02 | 2 | 59  | MSigDB:LEE LIVER CANCER MYC TGFA UP                                   |
| 2.10E-02 | 3 | 193 | MSigDB:GSE1432 CTRL VS IFNG 6H MICROGLIA DN                           |
| 2.10E-02 | 3 | 193 | MSigDB:GSE1432 CTRL VS IFNG 24H MICROGLIA DN                          |
| 2.10E-02 | 3 | 192 | MSigDB:GSE1432 1H VS 6H IFNG MICROGLIA DN                             |
| 2.10E-02 | 3 | 193 | MSigDB:GSE17721 0.5H VS 24H CPG BMDC DN                               |
| 2.10E-02 | 3 | 192 | MSigDB:GSE24634 IL4 VS CTRL TREATED NAIVE CD4 TCELL DAY5 DN           |
| 2.10E-02 | 3 | 192 | MSigDB:GSE42021 TCONV PLN VS CD24HI TCONV THYMUS UP                   |
| 2.20E-02 | 3 | 194 | MSigDB:GSE41978 ID2 KO VS BIM KO KLRG1 LOW EFFECTOR CD8 TCELL UP      |
| 2.20E-02 | 3 | 195 | MSigDB:GSE18281 SUBCAPSULAR CORTICAL REGION VS WHOLE CORTEX THYMUS UP |

|          |   |      |                                                                                                |
|----------|---|------|------------------------------------------------------------------------------------------------|
| 2.20E-02 | 3 | 195  | MSigDB:GSE42021 TREG PLN VS CD24INT TREG THYMUS DN                                             |
| 2.20E-02 | 2 | 60   | GeneSetDB:MATADOR aminopyrine                                                                  |
| 2.20E-02 | 2 | 61   | Wiki:Oxidation by Cytochrome P450                                                              |
| 2.20E-02 | 2 | 61   | MSigDB:VANHARANTA UTERINE FIBROID DN                                                           |
| 2.30E-02 | 2 | 62   | GeneSetDB:MATADOR bezafibrate                                                                  |
| 2.40E-02 | 2 | 63   | Intercellular bridge                                                                           |
| 2.40E-02 | 2 | 63   | MSigDB:LEE LIVER CANCER ACOX1 UP                                                               |
| 2.50E-02 | 2 | 65   | Reactome:R-HSA-211897 Cytochrome P450 - arranged by substrate type                             |
| 2.50E-02 | 3 | 207  | Reactome:R-HSA-2454202 Fc epsilon receptor (FCER1) signaling                                   |
| 2.50E-02 | 3 | 206  | Reactome:R-HSA-198933 Immunoregulatory interactions between a Lymphoid and a non-Lymphoid cell |
| 2.50E-02 | 2 | 65   | Transferase activity, transferring alkyl or aryl (other than methyl) groups                    |
| 2.50E-02 | 2 | 65   | GeneSetDB:MATADOR rosiglitazone                                                                |
| 2.50E-02 | 3 | 207  | MSigDB:ACEVEDO LIVER CANCER WITH H3K27ME3 DN                                                   |
| 2.60E-02 | 4 | 413  | RegNetwork:FOXA2                                                                               |
| 2.60E-02 | 2 | 67   | MiRTarBase:hsa-miR-499a-3p                                                                     |
| 2.60E-02 | 3 | 212  | GeneSetDB:STITCH NADP(CID100000929)                                                            |
| 2.60E-02 | 3 | 213  | Reactome:R-HSA-202733 Cell surface interactions at the vascular wall                           |
| 2.70E-02 | 2 | 69   | Drug metabolism                                                                                |
| 2.90E-02 | 2 | 73   | Platinum drug resistance                                                                       |
| 2.90E-02 | 2 | 73   | GeneSetDB:STITCH methanol(CID000000887)                                                        |
| 2.90E-02 | 3 | 224  | GeneSetDB:STITCH NADP(CID000005885)                                                            |
| 2.90E-02 | 2 | 73   | MSigDB:DACOSTA UV RESPONSE VIA ERCC3 COMMON UP                                                 |
| 2.90E-02 | 2 | 73   | CTD:ABCB5                                                                                      |
| 2.90E-02 | 2 | 73   | CTD:CHEBI                                                                                      |
| 2.90E-02 | 2 | 73   | CTD:CIAPIN1                                                                                    |
| 2.90E-02 | 2 | 73   | CTD:RALBP1                                                                                     |
| 2.90E-02 | 2 | 73   | CTD:RUNX3                                                                                      |
| 2.90E-02 | 2 | 73   | CTD:ZNRD1                                                                                      |
| 3.00E-02 | 2 | 74   | CTD:PPP1R1B                                                                                    |
| 3.20E-02 | 2 | 76   | CTD:SLC22A16                                                                                   |
| 3.30E-02 | 2 | 78   | Drug metabolism                                                                                |
| 3.50E-02 | 2 | 80   | GeneSetDB:MATADOR desferrioxamine                                                              |
| 3.50E-02 | 2 | 81   | GeneSetDB:MATADOR felodipine                                                                   |
| 3.60E-02 | 6 | 1025 | CTD:CHEBI                                                                                      |
| 3.90E-02 | 3 | 251  | MSigDB:chr12q13                                                                                |
| 3.90E-02 | 2 | 86   | MSigDB:KIM BIPOLAR DISORDER OLIGODENDROCYTE DENSITY CORR DN                                    |
| 4.10E-02 | 2 | 88   | Recon X:SLC25A16                                                                               |

|          |   |      |                                   |
|----------|---|------|-----------------------------------|
| 4.10E-02 | 6 | 1053 | Carboxylic acid metabolic process |
| 4.20E-02 | 2 | 89   | GeneSetDB:MATADOR halothane       |
| 4.20E-02 | 2 | 89   | GeneSetDB:MATADOR paraoxon        |
| 4.20E-02 | 3 | 260  | MSigDB:chr22q11                   |
| 4.20E-02 | 2 | 90   | Modified amino acid binding       |
| 4.30E-02 | 4 | 492  | CTD:ABCC1                         |
| 4.60E-02 | 9 | 2142 | Small molecule metabolic process  |
| 4.80E-02 | 2 | 97   | GeneSetDB:MATADOR nifedipine      |

**Table S8.** Enrichment of genes differentiated by copy number ( $V_{ST} > 0.21$ ) between brown bear and polar bear using the black bear as a reference genome. Enrichment analysis was conducted via ShinyGoV0.51 (Ge and Jung, 2018; <http://bioinformatics.sdstate.edu/go/>).

| <b>Enrichment FDR</b> | <b>Genes in list</b> | <b>Total genes</b> | <b>Functional Category</b>                                             |
|-----------------------|----------------------|--------------------|------------------------------------------------------------------------|
| 1.40E-12              | 34                   | 573                | Olfactory receptor activity                                            |
| 1.40E-12              | 32                   | 500                | Olfactory transduction                                                 |
| 1.40E-12              | 34                   | 573                | Detection of chemical stimulus involved in sensory perception of smell |
| 2.30E-12              | 35                   | 625                | Detection of chemical stimulus                                         |
| 2.50E-12              | 34                   | 594                | Sensory perception of smell                                            |
| 3.00E-12              | 34                   | 605                | Detection of chemical stimulus involved in sensory perception          |
| 3.00E-12              | 37                   | 717                | Detection of stimulus                                                  |
| 1.60E-11              | 34                   | 645                | Sensory perception of chemical stimulus                                |
| 1.60E-11              | 34                   | 646                | Detection of stimulus involved in sensory perception                   |
| 2.20E-09              | 37                   | 908                | Sensory perception                                                     |
| 5.20E-08              | 35                   | 922                | G protein-coupled receptor activity                                    |
| 8.90E-08              | 41                   | 1245               | Nervous system process                                                 |
| 1.10E-06              | 39                   | 1251               | Transmembrane signaling receptor activity                              |
| 4.10E-06              | 37                   | 1210               | G protein-coupled receptor signaling pathway                           |
| 6.60E-06              | 40                   | 1402               | Signaling receptor activity                                            |
| 1.30E-05              | 40                   | 1443               | Molecular transducer activity                                          |
| 1.20E-04              | 42                   | 1695               | System process                                                         |
| 2.40E-03              | 6                    | 52                 | Chemical carcinogenesis                                                |
| 3.50E-03              | 6                    | 56                 | Arachidonic acid metabolism                                            |
| 4.00E-03              | 3                    | 7                  | Astrocyte activation                                                   |
| 9.10E-03              | 2                    | 2                  | Positive regulation of amyloid fibril formation                        |
| 9.10E-03              | 2                    | 2                  | Astrocyte activation involved in immune response                       |
| 9.10E-03              | 2                    | 2                  | Smooth endoplasmic reticulum calcium ion homeostasis                   |
| 9.90E-03              | 60                   | 3344               | Response to chemical                                                   |
| 1.20E-02              | 5                    | 47                 | Retinol metabolism                                                     |
| 1.20E-02              | 6                    | 74                 | PPAR signaling pathway                                                 |
| 1.30E-02              | 5                    | 48                 | Metabolism of xenobiotics by cytochrome P450                           |
| 2.20E-02              | 3                    | 13                 | Glial cell activation                                                  |
| 2.30E-02              | 7                    | 118                | Heme binding                                                           |
| 2.60E-02              | 6                    | 87                 | Monooxygenase activity                                                 |
| 2.90E-02              | 7                    | 124                | Tetrapyrrole binding                                                   |
| 3.00E-02              | 3                    | 15                 | Acyl-CoA hydrolase activity                                            |
| 3.60E-02              | 2                    | 4                  | Neuron projection maintenance                                          |
| 3.60E-02              | 2                    | 4                  | Alpha-beta T cell receptor complex                                     |
| 4.10E-02              | 3                    | 17                 | CoA hydrolase activity                                                 |

|          |   |    |                            |
|----------|---|----|----------------------------|
| 4.40E-02 | 4 | 39 | Fatty acid degradation     |
| 4.60E-02 | 5 | 68 | Cell fate specification    |
| 4.60E-02 | 3 | 18 | Neuroinflammatory response |

**Table S9.** Enrichment of genes extremely differentiated by copy number ( $V_{ST} > 0.35$ ) between brown bear and polar bear using the black bear as a reference genome. Enrichment analysis was conducted via ShinyGoV0.51 (Ge and Jung, 2018; <http://bioinformatics.sdstate.edu/go/>).

| Enrichment FDR | Genes in list | Total genes | Functional Category                                                                                   |
|----------------|---------------|-------------|-------------------------------------------------------------------------------------------------------|
| 2.00E-13       | 22            | 573         | Olfactory receptor activity                                                                           |
| 2.00E-13       | 22            | 573         | Detection of chemical stimulus involved in sensory perception of smell                                |
| 2.80E-13       | 22            | 594         | Sensory perception of smell                                                                           |
| 3.00E-13       | 22            | 605         | Detection of chemical stimulus involved in sensory perception                                         |
| 4.70E-13       | 22            | 625         | Detection of chemical stimulus                                                                        |
| 5.80E-13       | 20            | 500         | Olfactory transduction                                                                                |
| 5.80E-13       | 22            | 645         | Sensory perception of chemical stimulus                                                               |
| 5.80E-13       | 22            | 646         | Detection of stimulus involved in sensory perception                                                  |
| 4.30E-12       | 22            | 717         | Detection of stimulus                                                                                 |
| 4.20E-10       | 22            | 908         | Sensory perception                                                                                    |
| 5.20E-10       | 22            | 922         | G protein-coupled receptor activity                                                                   |
| 6.40E-10       | 25            | 1251        | Transmembrane signaling receptor activity                                                             |
| 1.10E-09       | 26            | 1402        | Signaling receptor activity                                                                           |
| 1.90E-09       | 26            | 1443        | Molecular transducer activity                                                                         |
| 1.10E-08       | 23            | 1210        | G protein-coupled receptor signaling pathway                                                          |
| 1.80E-08       | 23            | 1245        | Nervous system process                                                                                |
| 5.50E-06       | 23            | 1695        | System process                                                                                        |
| 1.40E-05       | 7             | 118         | Heme binding                                                                                          |
| 1.80E-05       | 7             | 124         | Tetrapyrrole binding                                                                                  |
| 3.50E-05       | 6             | 87          | Monooxygenase activity                                                                                |
| 5.00E-05       | 7             | 146         | Oxidoreductase activity, acting on paired donors, with incorporation or reduction of molecular oxygen |
| 6.80E-05       | 7             | 155         | Iron ion binding                                                                                      |
| 6.80E-05       | 5             | 56          | Arachidonic acid metabolism                                                                           |
| 3.60E-04       | 4             | 39          | Fatty acid degradation                                                                                |
| 5.20E-04       | 3             | 15          | Acyl-CoA hydrolase activity                                                                           |
| 7.00E-04       | 4             | 47          | Retinol metabolism                                                                                    |
| 7.10E-04       | 3             | 17          | CoA hydrolase activity                                                                                |
| 9.80E-04       | 4             | 52          | Chemical carcinogenesis                                                                               |
| 1.50E-03       | 2             | 4           | Alpha-beta T cell receptor complex                                                                    |
| 1.50E-03       | 28            | 3344        | Response to chemical                                                                                  |
| 2.10E-03       | 3             | 25          | Biosynthesis of unsaturated fatty acids                                                               |
| 3.40E-03       | 4             | 74          | PPAR signaling pathway                                                                                |
| 3.70E-03       | 3             | 31          | Thiolester hydrolase activity                                                                         |
| 4.10E-03       | 29            | 3756        | Plasma membrane                                                                                       |

|          |    |      |                                                                                                                                                                                             |
|----------|----|------|---------------------------------------------------------------------------------------------------------------------------------------------------------------------------------------------|
| 4.80E-03 | 6  | 231  | Fatty acid metabolic process                                                                                                                                                                |
| 6.70E-03 | 29 | 3876 | Cell periphery                                                                                                                                                                              |
| 7.40E-03 | 3  | 41   | Xenobiotic metabolic process                                                                                                                                                                |
| 7.40E-03 | 4  | 95   | Inflammatory mediator regulation of TRP channels                                                                                                                                            |
| 9.60E-03 | 2  | 11   | Arachidonic acid monooxygenase activity                                                                                                                                                     |
| 9.60E-03 | 2  | 11   | Arachidonic acid epoxygenase activity                                                                                                                                                       |
| 9.60E-03 | 2  | 11   | Epoxygenase P450 pathway                                                                                                                                                                    |
| 1.10E-02 | 3  | 48   | Metabolism of xenobiotics by cytochrome P450                                                                                                                                                |
| 1.10E-02 | 2  | 12   | T cell receptor complex                                                                                                                                                                     |
| 1.10E-02 | 11 | 894  | Transition metal ion binding                                                                                                                                                                |
| 1.20E-02 | 3  | 51   | Long-chain fatty acid metabolic process                                                                                                                                                     |
| 1.20E-02 | 2  | 13   | Positive thymic T cell selection                                                                                                                                                            |
| 1.60E-02 | 5  | 209  | Sulfur compound metabolic process                                                                                                                                                           |
| 1.70E-02 | 3  | 59   | Acyl-CoA metabolic process                                                                                                                                                                  |
| 1.70E-02 | 3  | 59   | Thioester metabolic process                                                                                                                                                                 |
| 2.10E-02 | 3  | 65   | Cellular response to xenobiotic stimulus                                                                                                                                                    |
| 2.10E-02 | 7  | 448  | Cofactor binding                                                                                                                                                                            |
| 2.30E-02 | 2  | 19   | Exogenous drug catabolic process                                                                                                                                                            |
| 2.50E-02 | 2  | 20   | Proton-transporting two-sector ATPase complex, catalytic domain                                                                                                                             |
| 2.60E-02 | 9  | 735  | Oxidoreductase activity                                                                                                                                                                     |
| 2.80E-02 | 2  | 22   | Arachidonic acid metabolic process                                                                                                                                                          |
| 2.80E-02 | 3  | 76   | Nucleoside bisphosphate metabolic process                                                                                                                                                   |
| 2.80E-02 | 3  | 76   | Ribonucleoside bisphosphate metabolic process                                                                                                                                               |
| 2.80E-02 | 3  | 76   | Purine nucleoside bisphosphate metabolic process                                                                                                                                            |
| 2.80E-02 | 2  | 22   | Thymic T cell selection                                                                                                                                                                     |
| 2.90E-02 | 2  | 23   | Proton-transporting ATPase activity, rotational mechanism                                                                                                                                   |
| 3.10E-02 | 2  | 24   | Oxidoreductase activity, acting on paired donors, with incorporation or reduction of molecular oxygen, reduced flavin or flavoprotein as one donor, and incorporation of one atom of oxygen |
| 3.50E-02 | 2  | 26   | Fatty acid elongation                                                                                                                                                                       |
| 3.50E-02 | 2  | 26   | Very long-chain fatty acid metabolic process                                                                                                                                                |
| 3.70E-02 | 2  | 27   | Steroid hydroxylase activity                                                                                                                                                                |
| 3.70E-02 | 2  | 27   | Positive T cell selection                                                                                                                                                                   |
| 4.10E-02 | 6  | 399  | Monocarboxylic acid metabolic process                                                                                                                                                       |
| 4.10E-02 | 2  | 29   | Glutathione transferase activity                                                                                                                                                            |
| 4.90E-02 | 2  | 32   | Proton-exporting ATPase activity                                                                                                                                                            |
| 4.90E-02 | 2  | 32   | Primary immunodeficiency                                                                                                                                                                    |



**Additional dataset S1 (separate file).**

Estimates of gene copy number and differentiation between brown bear and polar bear.

**Additional dataset S2 (separate file).**

Genes differentiated by copy number ( $V_{ST} > 0.22$ ) between brown bear and polar bear.
